# 1 **Black pod disease profile: Monitoring its outbreak in**

## 2 **Southwest, Nigeria**

3 Peter M. Etaware <sup>1\*</sup>

4 Adegboyega R. Adedeji<sup>2</sup>

5 <sup>1</sup> Department of Botany, Faculty of Science, University of Ibadan, Ibadan, Nigeria

6 <sup>2</sup> Cocoa Research Institute of Nigeria (CRIN), Idi-Ayunre, Ibadan, Nigeria

7

8 \* Corresponding Author

9 Email: [peterparkers007@gmail.com](mailto:peterparkers007@gmail.com)

## 10 **Abstract**

11 Black pod disease (BPD) has been and still remains a major threat to cocoa farmers worldwide  
12 due to its annual recurrence, fast spread and highly destructive nature. The disease has caused  
13 great anxiety in many cocoa producing communities due to the inability of indigenous cocoa  
14 farmers to determine when and where BPD outbreak will take place. Twelve (12) stations were  
15 structured from four important cocoa-producing States in the Southwestern region of Nigeria. An  
16 investigation of BPD outbreak was conducted in 2015/2016 within these regions. Infected cocoa  
17 pods and topsoil samples were collected for laboratory analysis. Pests attack, cherelle wilt and  
18 BPD outbreak were seasonal with 50% chances of occurrence in all the stations. Black pod  
19 diseases outbreak was recorded in all the States (100%) during the rainy season. The disease was  
20 at its peak in August 2015 in almost all the stations (station 1 (30.0%), station 3 (23.0%), station  
21 11 (16.0%), station 4 (9.0%), station 5 (7.0%), and station 8 (3.0%). The height of disease  
22 severity was in September 2015 (station 1 (100.0%), station 3 (96.7%), station 5 (85.7%), station  
23 11 (84.3%), and station 4 (70.0%), with station 8 reaching the 100% mark in October 2015. Most  
24 cocoa farmlands are now being abandoned, unless concerted efforts are made to effectively  
25 manage the disease, BPD will greatly reduce cocoa production in Nigeria and around the world.

26 **Keywords:** Black pod disease outbreak, indigenous cocoa farmers, Cherelle wilt, Pests, Seasonal  
27 Occurrence.

## 28 **Introduction**

29 *Theobroma cacao* Linn. (Cocoa) is an evergreen and relatively common understory tree growing  
30 4 - 8 m tall. Cocoa is native to the deep tropical region of South America, and is now widely  
31 cultivated in Africa and some parts of Europe, Asia and Australia. Cocoa cultivation has been a  
32 major source of income for most third world countries. The largest proportion of global cocoa  
33 beans (59%) comes from West Africa, with Côte d'Ivoire and Ghana producing 1,472,313  
34 858,720 tonnes respectively in 2016 [1]. Unlike many exotic crops, Cocoa is highly susceptible  
35 to pestilence [2]. These pestilences occur seasonally and as such are influenced by weather, they  
36 mostly affect coupons, cherelles, unripe and ripe cocoa pods at different developmental stages in  
37 the field [3].

38 The earliest account of cocoa pestilence in Africa was reported by Thorold [4]. The topmost  
39 invasive diseases of cocoa are black pod disease, swollen shoot, witches' broom, *Monilia* pod rot,  
40 and vascular-streak dieback [3]. Black pod disease has been the most recurrent, highly  
41 destructive, dreaded and widespread among other diseases [3]. This disease however seems more  
42 established in West Africa than in other cocoa-growing regions around the world. In Nigeria,  
43 Cameroon and Togo, black pod disease constitutes the greatest set-back to cocoa production with  
44 losses of up to 90% [3]. In the early 1980s, black pod disease in Ghana was only known to be  
45 caused by *P. Palmivora*. However, in 1985, a severe outbreak, which appeared different from  
46 that previously known, was reported in the Akomodan area of the Ashanti region. Laboratory  
47 investigations by Dakwa [5] on diseased cocoa pod samples showed that *P. megakarya* was the  
48 causal agent, and this was subsequently confirmed by several researchers [6,7]. This was the first  
49 reported incidence of the species in Ghana, but earlier observations and research activities  
50 carried out in the Volta region indicated that the species might have existed there, perhaps as far  
51 back as the early 1970s. *Phytophthora megakarya* had been reported in many other African

52 nations including Gabon, Equatorial Guinea where it was reputed for massive declines in cocoa  
53 production before 1985, [3].

54 The occurrence of *P. megakarya* in West Africa has changed the status of black pod disease in  
55 Ghana, Nigeria, Cameroun and other regions involved in cocoa production. Black pod disease  
56 has been attributed to several species of *Phytophthora* such as *P. drechsleri* [8], *P. botryosa* [9],  
57 *P. heveae* [10], *P. meadii* [11], *P. capsici* [12], *P. megakarya* [13], *P. citrophthora* [14], *P.*  
58 *katsurae* [15] and *P. tropicalis* [16]. Black pod disease caused by *P. megakarya* continues to be  
59 the major threat to cocoa production in West Africa [3,6]. Virulence in *P. megakarya* emanates from  
60 the ability to produce large number of spores on the pod surface [17].

61 *P. megakarya* produces lesions of black pod disease with irregular edges on the pod surface  
62 whereas lesions caused by *P. palmivora* have regular borders and are generally smaller [18]. The  
63 first symptom is a brown to black spot on the pod, which spreads rapidly in all directions and  
64 eventually covers the whole pod. The beans become infected internally about 15 days after the  
65 initial infection and are soon of no commercial value [19]. Generally, pods closest to the ground  
66 are first infected, with the disease rapidly spreading to affect fruit on the entire tree.  
67 *Phytophthora megakarya* can also cause seedling blight and trunk cankers [20]

68 The disease now poses a serious threat to the cocoa industry and has caused great anxiety and  
69 concern in many cocoa producing communities. Pod losses to *P. megakarya* are massive and  
70 some farmers in the affected areas have had virtually no crop for many seasons. As a result of the  
71 disease, cocoa farms are being neglected or totally abandoned and some farmers seemingly have  
72 little or no enthusiasm in establishing new cocoa farms in the areas where the percentage of  
73 black pod disease occurrence is very high [3]. In addition, most farm concierges have turned  
74 their attention to other crops due to the incessant black pod disease infestation on cocoa crop.  
75 Reports from indigenous cocoa farmers and extension workers as well as reports from the field

76 during black pod surveys indicate that *P. megakarya* proliferates faster and it has spread to some  
77 important cocoa-growing areas leading to an upsurge of the disease. The disease is not only  
78 responsible for immense pod losses, but also infliction of severe stem canker resulting in the  
79 death of many cocoa trees [7].

80 The success rate achieved by both biological and chemical control measures is fast declining due  
81 to the high level of adaptation of the pathogen to harsh conditions, the constant change in rainfall  
82 pattern and irregular fluctuation of other weather parameters coupled with the drastic increase in  
83 vulnerability of cocoa plants. The dearth of information on the ontogeny and phylogenetic trend  
84 of the species of *Phytophthora* involved in the recurrent annual perpetuation of black pod disease  
85 in cocoa producing areas within the rural and sub-urban communities in Nigeria is a major  
86 setback to the effective management of the disease in Nigeria. Hence, there is an urgent need for  
87 a revolutionized approach in the management of black pod disease. Unless concerted efforts are  
88 made to effectively manage the disease BPD will greatly reduce cocoa production in Nigeria and  
89 around the world [3,21]. Therefore, this study was designed to develop a system for black pod  
90 disease prediction in order to provide useful and timely information on black pod disease  
91 occurrence, its severity and the specific areas expected to be affected. This will minimize  
92 fungicide misuse, increase cocoa productivity, reduce the risk of chemical poisoning, increase  
93 farmers' profit, foreign exchange and internally generated revenue, and ensure the availability of  
94 disease-free and non-toxic raw materials for cocoa processing industries. Lastly, it will create a  
95 clean and healthy environment for the sustenance of all forms of life.

## 96 **Materials and methods**

### 97 **Research Locations**

98 Twelve (12) commercial cocoa farms in Southwest, Nigeria were selected for black pod disease  
99 assessment (Table 1; S1 Appendix). The criteria for selection were: 1) farm size (The minimum  
100 acceptable size was 10,000 m<sup>2</sup>), 2) consistency in cocoa production, 3) cropping system and 4)  
101 locality. These were used to determine the suitability of the selected cocoa farms in line with the  
102 aim of the current research. The selected locations were classed as stations for ease of  
103 identification (Figs 1 - 2).

104 Table 1: Location of sampled stations and size of farms surveyed.

| Station | Location      | Latitude N    | Longitude E   | Altitude (m) | Size (m <sup>2</sup> ) |
|---------|---------------|---------------|---------------|--------------|------------------------|
| 1       | Òwenà         | 7° 12' 11.52" | 5° 00' 55.76" | 289          | 10,000                 |
| 2       | Òwenà         | 7° 12' 11.50" | 5° 00' 55.76" | 291          | 10,000                 |
| 3       | Wáàsimi       | 7° 10' 42.78" | 4° 59' 31.34" | 249          | 30,000                 |
| 4       | Adaàgbà       | 7° 22' 13.80" | 4° 33' 34.42" | 262          | 40,000                 |
| 5       | Iyánfowórogì  | 7° 21' 55.22" | 4° 34' 16.54" | 259          | 20,000                 |
| 6       | Owódé-Igàngán | 7° 29' 59.99" | 4° 48' 59.99" | 276          | 50,000                 |
| 7       | Owódé-Igàngán | 7° 29' 53.45" | 4° 48' 59.01" | 282          | 50,000                 |
| 8       | Qbáfémi-Owódé | 7° 08' 30.37" | 3° 25' 56.71" | 187          | 10,000                 |
| 9       | Qbáfémi-Owódé | 7° 08' 30.32' | 3° 25' 56.73" | 192          | 10,000                 |
| 10      | Mòyè          | 7° 18' 54.54" | 4° 01' 09.34" | 205          | 20,000                 |
| 11      | Qmi-Adió      | 7° 20' 47.58" | 3° 44' 30.59" | 174          | 20,000                 |
| 12      | Olórò         | 7° 20' 44.00" | 3° 59' 34.00" | 179          | 10,000                 |

105

## 106 **Epidemiological Survey within the Stations**

107 Black pod disease assessment was conducted for thirteen (13) consecutive months. The period of  
108 the disease assessment covered the major cocoa growing season (March to October), the minor  
109 cocoa production season (November to April) and the optimum cocoa growing season (July to  
110 August) for cocoa production in Nigeria. The minimum Cocoa farm size considered for the  
111 assessment of black pod disease incidence and severity was ten thousand square meters (10,000  
112 m<sup>2</sup>) or one hectare (1 hectare).

113 The disease assessment was conducted both in the rainy season and dry season to determine the  
114 level of variation of black pod disease outbreak and severity brought about by seasonal changes.  
115 Also, the altitude of the study areas was considered in other to determine its influence on disease  
116 development and spread. Therefore, the study locations were classed accordingly and the  
117 observations made were grouped based on the established criterion.

## 118 **Black Pod Disease Occurrence**

119 The method adapted for black pod disease incidence determination was that of Luo [22]. Cocoa  
120 trees were assessed in a transverse and diagonal mode as described in Fig 2 and Plate 4 within  
121 each study location. Green and ripe Cocoa pods from each tree were inspected for the symptoms  
122 of black pod disease; the rain splash zone described in Plate 5 was of interest. If an infected pod  
123 was detected on the tree, the stand (tree) was noted as being infected. The assessment was  
124 repeated for a total of one hundred (100) trees and the observations noted. Each tree stand was  
125 noted as disease free (Healthy) or Infected based on the presence or absence of black pod disease  
126 symptoms. The observations were carried out for thirteen (13) months (May, 2015 to May,  
127 2016).

$$128 \quad \text{Black Pod Disease Occurrence} = \frac{\text{Number of infected trees}}{\text{Total number of trees}} \times 100$$

129

### 130 **Black Pod Disease Severity**

131 For the determination of black pod disease severity, Cocoa trees were also assessed in a  
132 transverse and diagonal mode as shown in S1 Fig [23]. Two methods were adapted for black pod  
133 disease severity determination to minimize error(s). The first method involves the measurement  
134 of infected cocoa pods and the percentage infection calculated based on the total Cocoa pod  
135 length basically from the rain splash zone (Fig 3). The second method involves the superficial  
136 assessment of the extent of damage inflicted by the disease on each infected cocoa pod and a  
137 score from 0 to 5 ascribed (Table 2) [24]. This scored served as the rating for the disease  
138 infection for that particular cocoa pod.

$$139 \quad \text{Black Pod Disease Severity} = \frac{\text{Length of Black Pod Infected Region on the Pod}}{\text{Length of Cocoa pod}} \times 100$$

### 140 **Fig 3: The mode of biological data collection on the field**

141 In general, the observations made within each Season, Station Altitude, State and the Southwest  
142 in general were calculated using the following formulae:

143 Observations recorded per Season: % SI = (SOS<sub>i</sub> /SL<sub>total</sub>)

144 Where SI = Seasonal Influence on BPD Status, SOS<sub>i</sub> = Sum of all observations made per Season  
145 (per month) and SL<sub>total</sub> = The Total No. of study locations assessed

146 Observations recorded per Altitude level: % AI = (SOA<sub>i</sub> /SL<sub>total</sub>)

147 Where AI = Altitudinal influence on BPD Status, SOA<sub>i</sub> = Sum of all observations made per  
148 altitudinal Level (per month) and SL<sub>total</sub> = The Total No. of study locations assessed

149 BPD Status in Southwest Nigeria: % BSS = (SO<sub>i</sub> /SL<sub>total</sub>)



150 Where BSS = BPD Status in Southwest, Nigeria,  $SO_i$  = Sum of all observations (per month)

151 from the stations and  $SL_{total}$  = The Total No. of study locations assessed

152 For BPD Status in States:  $\% BST = (ST_i / SL_{total})$

153 Where BST = BPD Status in each State,  $SOS_i$  = the sum of BPD Status from all the sampled

154 stations within a State (per month) and  $SL_{total}$  = The Total No. of study locations assessed

155

156 **Fig 1: The geographical locations of the selected cocoa farm stations in Southwest Nigeria.**

157 **Fig 2: The severity intensity of black pod disease in Nigeria (2015/2016)**

158

159 Table 2: Black pod disease severity status determination

| <b>BPD INFECTION per COCOA POD (BPD Severity)</b> |                         |                             |                  |
|---------------------------------------------------|-------------------------|-----------------------------|------------------|
| <b>Score</b>                                      | <b>Infected Portion</b> | <b>Percentage Infection</b> | <b>Inference</b> |
| 0                                                 | None                    | 0%                          | Healthy          |
| 1                                                 | ( $1/5$ )               | 20%                         | Not Severe       |
| 2                                                 | ( $2/5$ )               | 40%                         | Mildly Severe    |
| 3                                                 | ( $3/5$ )               | 60%                         | Averagely Severe |
| 4                                                 | ( $4/5$ )               | 80%                         | Severe           |
| 5                                                 | All                     | 100%                        | Extremely Severe |

160 An Adaptation of the modified methods of Akrofi [24]. BPD – Black pod disease

161

## 162 **Previous black pod disease records**

163 The previous disease record on the prevalence and intensity of black pod disease of cocoa was  
164 obtained from Cocoa Research Institute of Nigeria (CRIN), Idi-Ayunre, Ibadan, Oyo State,  
165 Nigeria and the report of Lawal and Emaku [23]. The data collected spanned from 1985 to 2014.

## 166 **Data Analysis**

167 Data were collected from the rain splash zone, root rhizosphere and husk dumpsite as shown in  
168 Fig 3. Qualitative data were represented as charts and graphs plotted using Microsoft Office  
169 (Excel) 2007 service pack and SPSS version 20.0 for 32 bits resolution. An Analysis of variance  
170 was carried out using COSTAT 9.0 software, while the homogeneity of means was determined  
171 using Duncan Multiple Range Test (DMRT).

## 172 **Results**

### 173 **Orientation on PDA (Morphological Characters)**

174 The pathogen appeared cotton white on potato dextrose agar (PDA) from day one. A single  
175 cluster of the velvet mycelia colony was formed around the Petri-plate. The silky mycelia colony  
176 turned pale creamy-yellow in older cultures due to the production of light lemon-yellowish  
177 secretion which could be a secondary metabolite or an extracellular secreted enzyme (no further  
178 test was conducted to determine the nature of the metabolite secreted) around the midpoint of  
179 inoculation as shown in Fig 4a

### 180 **Microscopy (Cytological Characters)**

181 The type of spore(s) produced i.e. chlamyospores (Zoospores), Oospores (Sexual spores) or  
182 aplanospores was the distinguishing factor within the various species of *Phytophthora* notable  
183 for inciting black pod disease. Micro-images of the hyphal structure appeared hyaline, septate

184 and heterogeneously branched, double walled with thin layers. The production of zoospores on  
185 special reproductive hyphae known as the sporangiophore was also noticed. The zoospores  
186 produced were double layered, ellipsoidal/oval in shape, with a pointed node each for attachment  
187 to the sporangiophore. Each zoospore had a single flagellum that facilitated mobility. The  
188 flagellum was short and located at the posterior part of the spore. The spore stained purple to  
189 violet when exposed to lactophenol in cotton blue dye and were categorically attached singly at  
190 the apices of the sporangiophore (Fig 4b).

191 **Fig 4: The morphological and cytological features of *Phytophthora megakarya* on potato**  
192 **dextrose agar (PDA) and under the microscope**

### 193 **The life cycle of *Phytophthora megakarya***

194 The life cycle of *P. megakarya* was studied in the Mycology/Pathology Laboratory of the  
195 Department of Botany, University of Ibadan (Fig 5). Spores of the pathogen germinated into  
196 motile zoospores (Fig 5b). The motile spores lose their flagella, germinate, and produce infection  
197 peg alongside penetration mechanisms in order to gain access into the host tissue (Fig 5c). After  
198 germination, the pathogen produces somatic cell structures, mycelia and hyphal structures (Fig  
199 5d). At maturity, the pathogen produces fruiting structures (sporangiophores) with spores  
200 apically located at the end of the hyphae (Fig 5e). Sporangiophores of *Phytophthora megakarya*  
201 are branched reproductive hyphae with thick walls. The sporangiophore bears spores that are  
202 attached to it by the peduncle (Fig 5e). Mature flagellated zoospores are then released into the  
203 environment when there is distress or limitation in food supply (Fig 5a).

204 The dispersed spores either swim towards nearby hosts based on the chemical attraction or  
205 signalling from the root rhizosphere or form thick enclosures that protect them from desiccation

206 and other adverse environmental conditions. Spore dispersion is often aided by rain splash or  
 207 insect activities (Fig 5). Pod infection start from cocoa pod closest to the soil and it is further  
 208 disseminated by the activities of insects and other rodents within the cocoa field (Fig 5).

209 **Fig 5: The life cycle of *Phytophthora megakarya* responsible for inciting black pod disease of**  
 210 **cocoa in South western Nigeria.**

## 211 **An overview of the major Diseases/Pestilence of cocoa in South** 212 **western Nigeria**

213 The statutory disease assessment conducted in Ogun, Ondo, Osun and Oyo States in South  
 214 western, Nigeria during the 2015/2016 cocoa production season showed that the probability for  
 215 the period of occurrence of pests (i.e. insect activities, rodents etc.) was 0.5 (50%), with the  
 216 activities of these pests severely rampant in the dry season. Cherelle wilt was noticed in all the  
 217 cocoa farms assessed in the dryer periods of the year 0.5 (50%) with no traces during the wet  
 218 season. It was further observed that black pod disease had the same level of probability in terms  
 219 of seasonal occurrence [0.5 (50%)] but the occurrence of black pod disease was majorly  
 220 prominent in the rainy season (Table 3).

221 Table 3: General estimation of the prevalence of diseases and pestilence of cocoa in  
 222 Southwest, Nigeria

| Disease   | Annual Prevalence (%) | Prob. of Occurrence | Rainy Season (%) | Dry Season (%) |
|-----------|-----------------------|---------------------|------------------|----------------|
| Black Pod | 100                   | 0.5                 | 100              | 0.0            |
| Cherelle  | 100                   | 0.5                 | 0.0              | 100            |

---

|  |            |      |     |     |     |
|--|------------|------|-----|-----|-----|
|  | Wilt       |      |     |     |     |
|  | Pestilence | 81.9 | 0.5 | 0.0 | 100 |
|  | Canker     | 0.0  | 0.0 | 0.0 | 0.0 |

---

223 Statutory disease assessment during the 2015/2016 cocoa production season in  
224 Southwest, Nigeria

## 225 **The Level of Diseases and Pest Invasion in South western Nigeria**

226 The level of black pod disease epidemics during the wet season was 100% across all the states.  
227 Cherelle wilt had 100% occurrence in the dry season but it was not as intensive as black pod  
228 disease. Insect and Pest invasion was 81.9% as it was undetected in some of the cocoa farms  
229 assessed (Table 3). There were no observable symptoms of stem canker in all the cocoa farms  
230 assessed from the far end of Ondo State to the rural communities in Ogun State. Therefore, the  
231 possibility of occurrence of stem canker within these regions was 0% and as such, one less  
232 problem for local cocoa farmers to contend with (Table 3).

## 233 **Black pod disease outbreak in the sampled Stations**

234 Black pod disease (BPD) was noticed early in Stations 5 and 6 with 3.0 and 9.0% level of  
235 epidemics respectively for May 2015 (Table 4). There were no visible signs or symptoms of the  
236 disease in other Stations (0.0% BPD incidence). In June 2015, Station 3 had the highest recorded  
237 BPD occurrence (12.0%), Station 5 was second on the disease profile list with BPD outbreak of  
238 11.0%. Stations 1, 2 and 4 had slightly severe epidemics (8.0, 7.0 and 7.0% respectively). Other  
239 Stations had NO epidemics (0.0%) as shown in Fig 6.

240 **Fig 6: Black pod disease incidence across Southwest, Nigeria for the 2015/2016 cocoa**  
241 **production season**

242 There was decline in BPD epidemics in September 2015, Station 4 took the lead (16.0%),  
243 followed by Station 8 with 15.0% BPD epidemics. Stations 11, 3, 1, and 5 had slightly severe to  
244 mild BPD outbreak of 14.0, 12.0, 10.0, and 7.0% respectively. Further decline in disease  
245 outbreak was noted in some Stations in the month of October like Station 11 (0.0%), Station 3  
246 (4.0%), Station 1 (6.0%), Station 5 (7.0%) and Station 4 (13.0%) with Station 8 showing  
247 progressive increase in black pod diseases occurrence (22.0%) as shown in Fig 6.

248 There were no observable symptoms or signs associated with BPD outbreak for November and  
249 December 2015, likewise January, February, March, April and May 2016 (Table 4). This was  
250 partly due to the fact that most cocoa farmers have harvested their pods from the field coupled  
251 with the fact that there was no available moisture within the soil surface to effect *Phytophthora*  
252 spore germination and dispersion.

253

254

255

256

257

258

259 Table 4: Profile of black pod disease outbreak within the sampled stations

| Period    | Average Monthly Disease Occurrence (%) |                  |                    |                   |                   |                  |                  |                  |                   |                  |                    |                  |
|-----------|----------------------------------------|------------------|--------------------|-------------------|-------------------|------------------|------------------|------------------|-------------------|------------------|--------------------|------------------|
|           | Òwenà                                  | Òwenà-2          | Wáàsimi            | Adaàgbà           | Iyánfowórogi      | O-Igàngán        | Owódé            | Q-Owódé          | Q-Owódé           | Mòyè             | D-Lógbà            | Olórò            |
| May 2015  | 0.0 <sup>c</sup>                       | 0.0 <sup>c</sup> | 0.0 <sup>c</sup>   | 0.0 <sup>c</sup>  | 3.0 <sup>b</sup>  | 9.0 <sup>a</sup> | 0.0 <sup>c</sup> | 0.0 <sup>c</sup> | 0.0 <sup>c</sup>  | 0.0 <sup>c</sup> | -                  | -                |
| June 2015 | 7.0 <sup>b</sup>                       | 8.0 <sup>b</sup> | 12.0 <sup>a</sup>  | 7.0 <sup>b</sup>  | 11.0 <sup>a</sup> | -                | -                | 0.0 <sup>c</sup> | 0.0 <sup>c</sup>  | -                | -                  | -                |
| July 2015 | 20.0 <sup>a</sup>                      | -                | 16.0 <sup>b</sup>  | 12.0 <sup>c</sup> | 15.0 <sup>b</sup> | -                | -                | 0.0 <sup>e</sup> | 0.0 <sup>e</sup>  | -                | 6.0 <sup>d</sup>   | -                |
| Aug.2015  | 30.0 <sup>a</sup>                      | -                | 23.0 <sup>b</sup>  | 9.0 <sup>d</sup>  | 7.0 <sup>d</sup>  | -                | -                | -                | 3.0 <sup>e</sup>  | -                | 16.0 <sup>c</sup>  | -                |
| Sept.2015 | 10.0 <sup>c</sup>                      | -                | 12.0 <sup>bc</sup> | 16.0 <sup>a</sup> | 7.0 <sup>d</sup>  | -                | -                | -                | 15.0 <sup>a</sup> | -                | 14.0 <sup>ab</sup> | -                |
| Oct. 2015 | 6.0 <sup>c</sup>                       | 0.0 <sup>e</sup> | 4.0 <sup>d</sup>   | 13.0 <sup>b</sup> | 7.0 <sup>c</sup>  | 0.0 <sup>e</sup> | -                | -                | 22.0 <sup>a</sup> | 0.0 <sup>e</sup> | 0.0 <sup>e</sup>   | 0.0 <sup>e</sup> |
| Nov.2015  | 0.0 <sup>a</sup>                       | 0.0 <sup>a</sup> | 0.0 <sup>a</sup>   | 0.0 <sup>a</sup>  | 0.0 <sup>a</sup>  | 0.0 <sup>a</sup> | -                | -                | 0.0 <sup>a</sup>  | 0.0 <sup>a</sup> | 0.0 <sup>a</sup>   | 0.0 <sup>a</sup> |
| Dec. 2015 | 0.0 <sup>a</sup>                       | 0.0 <sup>a</sup> | 0.0 <sup>a</sup>   | 0.0 <sup>a</sup>  | 0.0 <sup>a</sup>  | 0.0 <sup>a</sup> | -                | -                | 0.0 <sup>a</sup>  | 0.0 <sup>a</sup> | 0.0 <sup>a</sup>   | 0.0 <sup>a</sup> |
| Jan. 2016 | 0.0 <sup>a</sup>                       | 0.0 <sup>a</sup> | 0.0 <sup>a</sup>   | 0.0 <sup>a</sup>  | 0.0 <sup>a</sup>  | 0.0 <sup>a</sup> | -                | -                | 0.0 <sup>a</sup>  | 0.0 <sup>a</sup> | 0.0 <sup>a</sup>   | 0.0 <sup>a</sup> |
| Feb.2016  | 0.0 <sup>a</sup>                       | 0.0 <sup>a</sup> | 0.0 <sup>a</sup>   | 0.0 <sup>a</sup>  | 0.0 <sup>a</sup>  | 0.0 <sup>a</sup> | -                | -                | 0.0 <sup>a</sup>  | 0.0 <sup>a</sup> | 0.0 <sup>a</sup>   | 0.0 <sup>a</sup> |
| Mar.2016  | 0.0 <sup>a</sup>                       | 0.0 <sup>a</sup> | 0.0 <sup>a</sup>   | 0.0 <sup>a</sup>  | 0.0 <sup>a</sup>  | 0.0 <sup>a</sup> | -                | -                | 0.0 <sup>a</sup>  | 0.0 <sup>a</sup> | 0.0 <sup>a</sup>   | 0.0 <sup>a</sup> |
| Apr.2016  | 0.0 <sup>a</sup>                       | 0.0 <sup>a</sup> | 0.0 <sup>a</sup>   | 0.0 <sup>a</sup>  | 0.0 <sup>a</sup>  | 0.0 <sup>a</sup> | -                | -                | 0.0 <sup>a</sup>  | 0.0 <sup>a</sup> | 0.0 <sup>a</sup>   | 0.0 <sup>a</sup> |
| May 2016  | 0.0 <sup>a</sup>                       | 0.0 <sup>a</sup> | 0.0 <sup>a</sup>   | 0.0 <sup>a</sup>  | 0.0 <sup>a</sup>  | 0.0 <sup>a</sup> | -                | -                | 0.0 <sup>a</sup>  | 0.0 <sup>a</sup> | 0.0 <sup>a</sup>   | 0.0 <sup>a</sup> |

260 Means with the same alphabets across the row are not significantly different at P<0.05 using Duncan Multiple Range Test (DMRT) for

261 separation of statistically significant means. Data collected were represented as “Means” only

262 **O-Igàngán** : Owódé-Igàngán, **Q-Owódé** : Qbafèmi-Owódé, **D-Lógbà**: Dáagi-Lógbà

263

264

265 **Black pod disease outbreak in Ondo, Ogun, Osun and Oyo States**

266 Black pod disease outbreak was recorded early in Osun State (1.5%) in May 2015, other States  
267 had NO BPD incidence (0.0%). Ondo and Osun States experienced slight BPD outbreak (9.5 and  
268 9.0, respectively) in the month of June 2015. There was a progressive disease increase in Ondo  
269 State (18.0%) and Osun State (13.5%) for the month of July, 2015. Ogun and Oyo States had NO  
270 known cases of BPD outbreak for these months (Table 5).

271 Ondo State maintained top position in BPD outbreak (26.5%) for August 2015, closed followed  
272 by Oyo State (16.0%). Osun State and Ogun State had 8.0% and 3.0% respectively. An increase  
273 in BPD outbreak was experienced in Ogun State from the month of September (15.0%) through  
274 October (22.0%) in 2015, whereas Osun, Ondo and Oyo State experienced decline in BPD  
275 outbreak from 11.5 to 10.0%, 11.0 to 5.0%, and 14.0 and 0.0%, respectively (Table 5). There  
276 was no incidence of black pod disease prevalence in the dry season for these States.

277

278

279



281

282 Table 5: Monthly black pod disease assessment in four states within Southwest Nigeria

|           | <b>Monthly Regional Disease Occurrence (%) per 100 trees</b> |                   |                   |                   |
|-----------|--------------------------------------------------------------|-------------------|-------------------|-------------------|
|           | <b>Ondo</b>                                                  | <b>Osun</b>       | <b>Ogun</b>       | <b>Oyo</b>        |
| May 2015  | 0.0 <sup>b</sup>                                             | 1.5 <sup>a</sup>  | 0.0 <sup>b</sup>  | 0.0 <sup>b</sup>  |
| June 2015 | 9.5 <sup>a</sup>                                             | 9.0 <sup>a</sup>  | 0.0 <sup>b</sup>  | 0.0 <sup>b</sup>  |
| July 2015 | 18.0 <sup>a</sup>                                            | 13.5 <sup>b</sup> | 0.0 <sup>d</sup>  | 6.0 <sup>c</sup>  |
| Aug.2015  | 26.5 <sup>a</sup>                                            | 8.0 <sup>c</sup>  | 3.0 <sup>d</sup>  | 16.0 <sup>b</sup> |
| Sept.2015 | 11.0 <sup>a</sup>                                            | 11.5 <sup>a</sup> | 15.0 <sup>a</sup> | 14.0 <sup>a</sup> |
| Oct. 2015 | 5.0 <sup>c</sup>                                             | 10.0 <sup>b</sup> | 22.0 <sup>a</sup> | 0.0 <sup>d</sup>  |
| Nov.2015  | 0.0 <sup>a</sup>                                             | 0.0 <sup>a</sup>  | 0.0 <sup>a</sup>  | 0.0 <sup>a</sup>  |
| Dec. 2015 | 0.0 <sup>a</sup>                                             | 0.0 <sup>a</sup>  | 0.0 <sup>a</sup>  | 0.0 <sup>a</sup>  |
| Jan. 2016 | 0.0 <sup>a</sup>                                             | 0.0 <sup>a</sup>  | 0.0 <sup>a</sup>  | 0.0 <sup>a</sup>  |
| Feb.2016  | 0.0 <sup>a</sup>                                             | 0.0 <sup>a</sup>  | 0.0 <sup>a</sup>  | 0.0 <sup>a</sup>  |
| Mar.2016  | 0.0 <sup>a</sup>                                             | 0.0 <sup>a</sup>  | 0.0 <sup>a</sup>  | 0.0 <sup>a</sup>  |
| Apr.2016  | 0.0 <sup>a</sup>                                             | 0.0 <sup>a</sup>  | 0.0 <sup>a</sup>  | 0.0 <sup>a</sup>  |
| May 2016  | 0.0 <sup>a</sup>                                             | 0.0 <sup>a</sup>  | 0.0 <sup>a</sup>  | 0.0 <sup>a</sup>  |

283 Means with the same alphabets across the row are not significantly different at  $P < 0.05$  using Duncan  
284 Multiple Range Test (DMRT) for separation of statistically significant means. Data collected were  
285 represented as “Means” only

## 287 **Farm altitude and black pod disease Outbreak**

288 Cocoa farms located above 200m from sea level (>200m) experienced early BPD outbreak,  
289 beginning from May (0.8%) through August (17.3%) 2015 followed by a sharp decline from the  
290 month of September (11.3%) through October (7.5%) and 0% black pod disease incidence within

291 the dryer period of the season. This result was an Indication of the importance of altitude in black  
292 pod disease development (Table 6).

293 Cocoa farmlands located in regions that are below 200m above sea level ( $\leq 200\text{m}$ ) had a slow  
294 start to black pod disease development (Table 6) with the peak level of black pod disease  
295 prevalence in September 2015 (14.5%) and an abrupt decline in October (11.0%) in 2015  
296 through May 2016. A cross comparison between the two altitudes suggest that the activities of  
297 the pathogen was closely affected by the altitude of the cocoa farmlands, whereas the mode of  
298 spread was a function of the topography of the environment.

299

300

301

302

303

304

305

306

307

308

309 Table 6: Different Altitude levels of the sampled stations and its effects on black pod disease  
310 outbreak

| Period      | Altitude and %BPD expression per 100trees |                   |
|-------------|-------------------------------------------|-------------------|
|             | 100m - 200m                               | 201m - 300m       |
| May, 2015   | 0.0 <sup>b</sup>                          | 0.8 <sup>a</sup>  |
| June, 2015  | 0.0 <sup>b</sup>                          | 9.3 <sup>a</sup>  |
| July, 2015  | 3.0 <sup>b</sup>                          | 15.8 <sup>a</sup> |
| Aug., 2015  | 9.5 <sup>b</sup>                          | 17.3 <sup>a</sup> |
| Sept., 2015 | 14.5 <sup>a</sup>                         | 11.3 <sup>b</sup> |
| Oct., 2015  | 11.0 <sup>a</sup>                         | 7.5 <sup>b</sup>  |
| Nov., 2015  | 0.0 <sup>a</sup>                          | 0.0 <sup>a</sup>  |
| Dec., 2015  | 0.0 <sup>a</sup>                          | 0.0 <sup>a</sup>  |
| Jan., 2016  | 0.0 <sup>a</sup>                          | 0.0 <sup>a</sup>  |
| Feb., 2016  | 0.0 <sup>a</sup>                          | 0.0 <sup>a</sup>  |
| Mar., 2016  | 0.0 <sup>a</sup>                          | 0.0 <sup>a</sup>  |
| April, 2016 | 0.0 <sup>a</sup>                          | 0.0 <sup>a</sup>  |
| May, 2016   | 0.0 <sup>a</sup>                          | 0.0 <sup>a</sup>  |

311 Means with the same alphabets across the row are not significantly different at  $P < 0.05$  using  
312 Duncan Multiple Range Test (DMRT) for separation of statistically significant means. Data  
313 collected were represented as “Means” only

314

## 315 **Black pod disease prevalence and Severity in South western Nigeria**

316 The average disease occurrence within the Southwest for the month of May 2015 was 0.4%.  
317 Further records taken for the preceding months are as follow; June 2015 (4.6%), July 2015  
318 (9.4%), and August 2015 was the peak of disease occurrence within this terrain with an average  
319 value of 13.4% (per one hundred cocoa trees sampled). A decline in disease value was observed  
320 in the month of September 2015, with an average value of 12.9 %. Further decline in value  
321 occurred in October 2015 (9.3%) prior to harvesting of cocoa pods by farmers. The months of  
322 November, December 2015, January, February, March, April and May 2016 had negligible and  
323 unsubstantial amount of disease prevalence (Table 7). The same trend of disease report was  
324 observed within this zone for the disease severity. The peak of disease intensity was recorded in  
325 September 2015 with a mean value of 86.8%, while the least recorded occurrences were in the  
326 months of November, December 2015, January, February, March, April and May 2016 with  
327 0.0% disease intensity (Table 7).

328

329

330

331

332

333

334

335 Table 7: Black pod disease profile from May 2015 to May 2016 in Southwest, Nigeria

---

| <b>Black Pod Disease in Southwest Nigeria</b> |                            |                          |
|-----------------------------------------------|----------------------------|--------------------------|
| <b>Period</b>                                 | <b>Avg. Occurrence (%)</b> | <b>Avg. Severity (%)</b> |
| May, 2015                                     | 0.4 <sup>d</sup>           | 10.0 <sup>f</sup>        |
| June, 2015                                    | 4.6 <sup>c</sup>           | 56.6 <sup>c</sup>        |
| July, 2015                                    | 9.4 <sup>b</sup>           | 55.2 <sup>d</sup>        |
| Aug., 2015                                    | 13.4 <sup>a</sup>          | 79.8 <sup>b</sup>        |
| Sept., 2015                                   | 12.9 <sup>a</sup>          | 86.8 <sup>a</sup>        |
| Oct., 2015                                    | 9.3 <sup>b</sup>           | 49.3 <sup>e</sup>        |
| Nov., 2015                                    | 0.0 <sup>d</sup>           | 0.0 <sup>g</sup>         |
| Dec., 2015                                    | 0.0 <sup>d</sup>           | 0.0 <sup>g</sup>         |
| Jan., 2016                                    | 0.0 <sup>d</sup>           | 0.0 <sup>g</sup>         |
| Feb., 2016                                    | 0.0 <sup>d</sup>           | 0.0 <sup>g</sup>         |
| Mar., 2016                                    | 0.0 <sup>d</sup>           | 0.0 <sup>g</sup>         |
| April, 2016                                   | 0.0 <sup>d</sup>           | 0.0 <sup>g</sup>         |
| May, 2016                                     | 0.0 <sup>d</sup>           | 0.0 <sup>g</sup>         |

---

336 Means with the same alphabets down the column are not significantly different at P<0.05 using  
337 Duncan Multiple Range Test (DMRT) for separation of statistically significant means. Data  
338 collected were represented as “Means” only

339

340

341

342

343

344

345 **Black pod disease profile in Ogun, Ondo, Osun and Oyo States**  
 346 **(Southwest, Nigeria)**

347 The general field assessment conducted in 2015/2016 showed that Ondo State had the highest  
 348 level of black pod disease prevalence (Incidence) and Osun State had the highest level of disease  
 349 Intensity (Severity) with average annual values of 8.8% for BPD outbreak (Ondo) and 53.1%  
 350 (Osun) for BPD severity (Table 8). The general result for BPD outbreak and prevalence was  
 351 recorded thus: Ondo State (8.8%, 46.2%), Osun State (6.7%, 53.1%), Ogun State (5.0%, 31.7%),  
 352 and Oyo State (4.5%, 39.3%) as reported in Table 8.

353 Table 8: Seasonal Changes and its influence on black pod disease outbreak in some  
 354 Southwestern States

| State | Occurrence (%)    |                  | Severity (%)       |                  |
|-------|-------------------|------------------|--------------------|------------------|
|       | Rainy Season      | Dry Season       | Rainy Season       | Dry Season       |
| Ondo  | 8.8 <sup>a</sup>  | 0.0 <sup>a</sup> | 46.2 <sup>ab</sup> | 0.0 <sup>a</sup> |
| Osun  | 6.7 <sup>b</sup>  | 0.0 <sup>a</sup> | 53.1 <sup>a</sup>  | 0.0 <sup>a</sup> |
| Ogun  | 5.0 <sup>bc</sup> | 0.0 <sup>a</sup> | 31.7 <sup>c</sup>  | 0.0 <sup>a</sup> |
| Oyo   | 4.5 <sup>c</sup>  | 0.0 <sup>a</sup> | 39.3 <sup>bc</sup> | 0.0 <sup>a</sup> |

355 Means with the same alphabets down the column are not significantly different at P<0.05 using  
 356 Duncan Multiple Range Test (DMRT) for separation of statistically significant means. Data  
 357 collected were represented as “Means” only.

358 The overall annual estimation of BPD intensity and outbreak within Southwest, Nigeria  
 359 (2015/2016) was 42.6% and 6.2% respectively (Table 9).

360 Table 9: The average black pod disease status in Southwest, Nigeria (2015/2016)

| <b>Black Pod Disease</b> | <b>Rainy Season (%)</b> | <b>Dry Season (%)</b> |
|--------------------------|-------------------------|-----------------------|
| <b>Occurrence</b>        | 6.2 <sup>a</sup>        | 0.0 <sup>b</sup>      |
| <b>Severity</b>          | 42.6 <sup>a</sup>       | 0.0 <sup>b</sup>      |

361 Means with the same alphabets across the row are not significantly different at P<0.05 using  
362 Duncan Multiple Range Test (DMRT) for separation of statistically significant means. Data  
363 collected were represented as “Means” only

### 364 **Black pod disease severity in the sampled Stations**

365 Black pod disease was expressed early in Stations 5 and 6 (60.0% and 71.1%). Other Stations  
366 had 0.0% disease expression in the month of May, 2015. The disease severity for June 2015 was  
367 93.9% for Station 3, 62.5% for Station 2, 60.0% for Station 1, 95.1% for Station 4, and 90.9%  
368 for Station 5. Other Stations had 0.0% BPD severity within that period (Table 10). Station 1 had  
369 the highest black pod disease intensity in the Southwest (87.5%) in the month of July, closely  
370 followed by Station 4 (78.1%), Station 11 (76.7%), Station 5 (62.2%), and Station 3 (60.0%)  
371 respectively.

372 In August, Station 3 had the highest BPD severity level (93.0%) in the Southwest of Nigeria,  
373 closely followed by Station 1 (92.7%), Station 5 (89.2%), Station 4 (80.0%), Station 11 (75.0%),  
374 and Station 8 (66.7%) as documented in Table 12. In September 2015, Station 1 had 100.0%  
375 BPD severity, Station 3 had 96.7%, Station 8 had 86.7%, Station 5 had 85.7%, Station 11 had

376 84.3%, and Station was the least with 70.0%. There was a massive decline in disease outbreak in  
377 some locations in the month of October like Station 11 (0.0%), Station 3 (55.0%), Station 1  
378 (0.0%). Stations 4, 5, and 8 still had high BPD severity with the following values 64.6, 74.3 and  
379 100.0%, respectively (Table 10). There were no observable symptoms of BPD within in the later  
380 periods of the season.

381

382

383

384

385

386

387

388

389

390

391

392



393 Table 10: Black pod disease severity levels within the selected stations

| Period      | Average Monthly Disease Severity (%) |                   |                   |                   |                   |                   |                  |                  |                    |                  |                   |       |
|-------------|--------------------------------------|-------------------|-------------------|-------------------|-------------------|-------------------|------------------|------------------|--------------------|------------------|-------------------|-------|
|             | Òwenà                                | Òwenà-2           | Wáàsimi           | Adaàgbà           | Iyánfowórogì      | O-Igàngán         | Owódé            | Q-Owódé          | Q-Owódé            | Mòyè             | D-Lógbà           | Olórò |
| May, 2015   | 0.0 <sup>c</sup>                     | 0.0 <sup>c</sup>  | 0.0 <sup>c</sup>  | 0.0 <sup>c</sup>  | 60.0 <sup>b</sup> | 71.1 <sup>a</sup> | 0.0 <sup>c</sup> | 0.0 <sup>c</sup> | 0.0 <sup>c</sup>   | 0.0 <sup>c</sup> | -                 | -     |
| June, 2015  | 60.0 <sup>b</sup>                    | 62.5 <sup>b</sup> | 93.3 <sup>a</sup> | 95.1 <sup>a</sup> | 90.9 <sup>a</sup> | -                 | -                | 0.0 <sup>c</sup> | 0.0 <sup>c</sup>   | -                | -                 | -     |
| July, 2015  | 87.5 <sup>a</sup>                    | -                 | 60.0 <sup>c</sup> | 78.1 <sup>b</sup> | 62.2 <sup>c</sup> | -                 | -                | 0.0 <sup>d</sup> | 0.0 <sup>d</sup>   | -                | 76.7 <sup>b</sup> | -     |
| Aug., 2015  | 92.7 <sup>a</sup>                    | -                 | 93.0 <sup>a</sup> | 80.0 <sup>c</sup> | 89.2 <sup>b</sup> | -                 | -                | -                | 66.7 <sup>e</sup>  | -                | 75.0 <sup>d</sup> | -     |
| Sept., 2015 | 100.0 <sup>a</sup>                   | -                 | 96.7 <sup>b</sup> | 70.0 <sup>e</sup> | 85.7 <sup>c</sup> | -                 | -                | -                | 86.7 <sup>c</sup>  | -                | 84.3 <sup>d</sup> | -     |
| Oct., 2015  | 0.0 <sup>e</sup>                     | 0.0 <sup>e</sup>  | 55.0 <sup>d</sup> | 64.6 <sup>c</sup> | 74.3 <sup>b</sup> | 0.0 <sup>e</sup>  | -                | -                | 100.0 <sup>a</sup> | 0.0 <sup>e</sup> | 0.0 <sup>e</sup>  | 0.0   |
| Nov., 2015  | 0.0 <sup>a</sup>                     | 0.0 <sup>a</sup>  | 0.0 <sup>a</sup>  | 0.0 <sup>a</sup>  | 0.0 <sup>a</sup>  | 0.0 <sup>a</sup>  | -                | -                | 0.0 <sup>a</sup>   | 0.0 <sup>a</sup> | 0.0 <sup>a</sup>  | 0.0   |
| Dec., 2015  | 0.0 <sup>a</sup>                     | 0.0 <sup>a</sup>  | 0.0 <sup>a</sup>  | 0.0 <sup>a</sup>  | 0.0 <sup>a</sup>  | 0.0 <sup>a</sup>  | -                | -                | 0.0 <sup>a</sup>   | 0.0 <sup>a</sup> | 0.0 <sup>a</sup>  | 0.0   |
| Jan., 2016  | 0.0 <sup>a</sup>                     | 0.0 <sup>a</sup>  | 0.0 <sup>a</sup>  | 0.0 <sup>a</sup>  | 0.0 <sup>a</sup>  | 0.0 <sup>a</sup>  | -                | -                | 0.0 <sup>a</sup>   | 0.0 <sup>a</sup> | 0.0 <sup>a</sup>  | 0.0   |
| Feb., 2016  | 0.0 <sup>a</sup>                     | 0.0 <sup>a</sup>  | 0.0 <sup>a</sup>  | 0.0 <sup>a</sup>  | 0.0 <sup>a</sup>  | 0.0 <sup>a</sup>  | -                | -                | 0.0 <sup>a</sup>   | 0.0 <sup>a</sup> | 0.0 <sup>a</sup>  | 0.0   |
| Mar., 2016  | 0.0 <sup>a</sup>                     | 0.0 <sup>a</sup>  | 0.0 <sup>a</sup>  | 0.0 <sup>a</sup>  | 0.0 <sup>a</sup>  | 0.0 <sup>a</sup>  | -                | -                | 0.0 <sup>a</sup>   | 0.0 <sup>a</sup> | 0.0 <sup>a</sup>  | 0.0   |
| April, 2016 | 0.0 <sup>a</sup>                     | 0.0 <sup>a</sup>  | 0.0 <sup>a</sup>  | 0.0 <sup>a</sup>  | 0.0 <sup>a</sup>  | 0.0 <sup>a</sup>  | -                | -                | 0.0 <sup>a</sup>   | 0.0 <sup>a</sup> | 0.0 <sup>a</sup>  | 0.0   |
| May, 2016   | 0.0 <sup>a</sup>                     | 0.0 <sup>a</sup>  | 0.0 <sup>a</sup>  | 0.0 <sup>a</sup>  | 0.0 <sup>a</sup>  | 0.0 <sup>a</sup>  | -                | -                | 0.0 <sup>a</sup>   | 0.0 <sup>a</sup> | 0.0 <sup>a</sup>  | 0.0   |

394 Means with the same alphabets across the row are not significantly different at P<0.05 using Duncan Multiple Range Test (DMRT) for separation  
 395 of statistically significant means. Data collected were represented as “Means” only. Owódé-Igàngán (O-Igàngán), Qbáfèmi-Owódé (Q-Owódé),  
 396 Dáagi-Lógbà (D-Lógbà)

## 397 **Black pod disease intensity in Ondo, Ogun, Osun and Oyo States**

398 The level of black pod disease severity was milder in the early periods of the 2015/2016 cocoa  
399 production season from the statutory disease assessment result documented in Table 11. It was  
400 observed that the intensity of the disease was more in Osun state with mean disease severity of  
401 30.0% in the month of May 2015 (during the rainy season), whereas, other states within the  
402 Southwest had no signs or symptoms of the disease (0.0% BPD severity). The persistency of  
403 black pod disease was more in June across cocoa farms located in Osun State (93.0%) and Ondo  
404 State (76.7%). The intensity of black pod disease was relatively insignificant in other States  
405 sampled within the same period.

406 There was rapid geometric increase in black pod disease expression and intensity within the  
407 months of July and August with a climax in September 2015 (Table 11). The disease severity for  
408 July was recorded thus: Ondo State (73.8%), Osun State (70.1%), Oyo State (76.7%) and Ogun  
409 State (0.0%). In August, Ondo State recorded 92.9% BPD intensity; Osun State had 84.6%,  
410 Ogun State (66.7%) and Oyo State (75.0%).

411 The disease intensity across Ogun, Ondo, Osun and Oyo States during the 2015/2016 cocoa  
412 production season for September 2015 was 98.3% (Ondo State), 86.7% (Ogun State), 84.3%  
413 (Oyo State) and 77.9% (Osun State). Ogun State had 100.0% disease intensity in the month of  
414 October 2015 which was contrary to the trend of disease progress in other States. Ondo State had  
415 27.5%, Osun State (69.5%) and Oyo State (0.0%). Subsequently, other months within the dryer  
416 periods of the year (2015/2016 cocoa production season) had insignificant disease intensity  
417 values (0%). The findings were recorded in Table 11.

418 Table 11: An evaluation of the average level of black pod disease severity in some Southwestern  
419 States

| Period      | Black Pod Disease Severity (%) |                   |                    |                   |
|-------------|--------------------------------|-------------------|--------------------|-------------------|
|             | Ondo                           | Osun              | Ogun               | Oyo               |
| May, 2015   | 0.0 <sup>b</sup>               | 30.0 <sup>a</sup> | 0.0 <sup>b</sup>   | -                 |
| June, 2015  | 76.7 <sup>b</sup>              | 93.0 <sup>a</sup> | 0.0 <sup>c</sup>   | -                 |
| July, 2015  | 73.8 <sup>b</sup>              | 70.1 <sup>c</sup> | 0.0 <sup>d</sup>   | 76.7 <sup>a</sup> |
| Aug., 2015  | 92.9 <sup>a</sup>              | 84.6 <sup>b</sup> | 66.7 <sup>d</sup>  | 75.0 <sup>c</sup> |
| Sept., 2015 | 98.3 <sup>a</sup>              | 77.9 <sup>d</sup> | 86.7 <sup>b</sup>  | 84.3 <sup>c</sup> |
| Oct., 2015  | 27.5 <sup>c</sup>              | 69.5 <sup>b</sup> | 100.0 <sup>a</sup> | 0.0 <sup>d</sup>  |
| Nov., 2015  | 0.0 <sup>a</sup>               | 0.0 <sup>a</sup>  | 0.0 <sup>a</sup>   | 0.0 <sup>a</sup>  |
| Dec., 2015  | 0.0 <sup>a</sup>               | 0.0 <sup>a</sup>  | 0.0 <sup>a</sup>   | 0.0 <sup>a</sup>  |
| Jan., 2016  | 0.0 <sup>a</sup>               | 0.0 <sup>a</sup>  | 0.0 <sup>a</sup>   | 0.0 <sup>a</sup>  |
| Feb., 2016  | 0.0 <sup>a</sup>               | 0.0 <sup>a</sup>  | 0.0 <sup>a</sup>   | 0.0 <sup>a</sup>  |
| Mar., 2016  | 0.0 <sup>a</sup>               | 0.0 <sup>a</sup>  | 0.0 <sup>a</sup>   | 0.0 <sup>a</sup>  |
| April, 2016 | 0.0 <sup>a</sup>               | 0.0 <sup>a</sup>  | 0.0 <sup>a</sup>   | 0.0 <sup>a</sup>  |
| May, 2016   | 0.0 <sup>a</sup>               | 0.0 <sup>a</sup>  | 0.0 <sup>a</sup>   | 0.0 <sup>a</sup>  |

420 Means with the same alphabets across the row are not significantly different at P<0.05 using  
421 Duncan Multiple Range Test (DMRT) for separation of statistically significant means. Data  
422 collected were represented as “Means” only

### 423 **Altitude and its effects on black pod disease expression**

424 It was observed that 15.0% black pod disease intensity was recorded for the month of May 2015  
425 for cocoa farmlands located at altitude higher than 200m above sea level (201m-300m) and 0.0%  
426 for cocoa plantations located within or below 200m above sea level (Table 12). The same trend  
427 was observed in June 2015 with 84.8% black pod disease intensity for cocoa farmlands situated  
428 within altitude 201m-300m and 0.0% for those located within or below 200m.

429 BPD intensity was progressive through the months of July 2015 (38.4% for cocoa farmlands  
 430 located below 200m altitude, and 71.9% for cocoa plantations above 200m), August 2015  
 431 (70.9% for cocoa fields below 200m altitude, and 88.7% for areas above 200m), with its peak  
 432 value in September 2015 for cocoa farmlands located below 200m height above sea level (85.5%  
 433 black pod disease expression), and 88.1% for areas above 200m in altitude. There was a decline  
 434 in black pod disease expression in October 2015, with a recorded value of 50.0% for areas  
 435 situated below or within 200m height above sea level and 48.5% for areas above 200m. There  
 436 was no expression of the disease during the dry season (Table 12).

437 Table 12: The influence of altitude on black pod disease severity in Southwest Nigeria

| <b>Duration</b> | <b>Height Above Sea Level</b> |                    |
|-----------------|-------------------------------|--------------------|
|                 | <b>100m - 200m</b>            | <b>201m - 300m</b> |
| May, 2015       | 0.0 <sup>b</sup>              | 15.0 <sup>a</sup>  |
| June, 2015      | 0.0 <sup>b</sup>              | 84.8 <sup>a</sup>  |
| July, 2015      | 38.4 <sup>b</sup>             | 71.9 <sup>a</sup>  |
| Aug., 2015      | 70.9 <sup>b</sup>             | 88.7 <sup>a</sup>  |
| Sept., 2015     | 85.5 <sup>a</sup>             | 88.1 <sup>b</sup>  |
| Oct., 2015      | 50.0 <sup>a</sup>             | 48.5 <sup>a</sup>  |
| Nov., 2015      | 0.0 <sup>a</sup>              | 0.0 <sup>a</sup>   |
| Dec., 2015      | 0.0 <sup>a</sup>              | 0.0 <sup>a</sup>   |
| Jan., 2016      | 0.0 <sup>a</sup>              | 0.0 <sup>a</sup>   |
| Feb., 2016      | 0.0 <sup>a</sup>              | 0.0 <sup>a</sup>   |
| Mar., 2016      | 0.0 <sup>a</sup>              | 0.0 <sup>a</sup>   |
| April, 2016     | 0.0 <sup>a</sup>              | 0.0 <sup>a</sup>   |
| May, 2016       | 0.0 <sup>a</sup>              | 0.0 <sup>a</sup>   |

438 Means with the same alphabets across the row are not significantly different at P<0.05 using  
 439 Duncan Multiple Range Test (DMRT) for separation of statistically significant means. Data  
 440 collected were represented as “Means” only

441

442

## 443 **Discussion**

### 444 **Black pod disease diagnosis in Ogun, Ondo, Osun and Oyo States,** 445 **Nigeria**

446 It was evident from the statutory disease assessment conducted that black pod disease was a  
447 major threat to cocoa production in Southwestern Nigeria. Its occurrence was recurrent and rapid  
448 with massive destruction and devastating effects as it spreads. Some areas identified to be under  
449 severe black pod disease attack include Òwenà and Wáàsimi in Ondo East local government area  
450 (LGA) of Ondo State, Adaàgbà and Iyánfowórogì in Ife South LGA of Osun State, Owódé-  
451 Igàngán and its' environs in Àtákúnmòsà East LGA of Osun State, Qbáfémi-Owódé in Abeokuta  
452 (Ogun State), Dáagi-Lógbà and Atèrè Villages within Qmi-Adió area of Iddo LGA, Olórò  
453 Village (Olorunda) in Àkànràn, and Mòyè village in Qnà-Arà LGA of Oyo State. This report was  
454 a confirmation of the findings of Adisa and Adeloye [25] who stated that these areas (particularly  
455 Osun State) have been identified as hotspots for black pod disease invasion, urgently in need of  
456 integrated disease management strategies.

### 457 **The trend of black pod disease occurrence in Southwest, Nigeria**

458 It was noted that the severity of black pod disease, its prevalence and spread was widely  
459 pronounced in the rainy season and there was 100% chances of black pod disease occurrence in  
460 all the cocoa farmlands investigated as long as there was consistent pattern of rainfall within that  
461 terrain. This was in agreement with the observations made by Adeniyi and Ogunsola [26] that the  
462 yearly variation in the yield of cocoa is affected more by rainfall and the disease thrives better  
463 when there is moisture available in the surrounding environment. Finally, the observations made  
464 by Anim-Kwapong and Frimpong [27] is a suggestion that cocoa is highly sensitive to changes

465 in weather pattern which can greatly influence its yield and productivity, and predispose it to a  
466 greater extent to black pod disease infection.

467 Other findings accrued from the research conducted showed that black pod disease was the most  
468 influential among all the diseases limiting cocoa production in Southwest, Nigeria. It was also  
469 noticed that insects and pests attack on green and ripe cocoa pods occurred during the dry season  
470 at epidemic proportions. Akrofi [24] consented to this fact but he did not give any information on  
471 the season of occurrence of these pests. A combination of the multiple effects of the pests and  
472 diseases was a major threat to local cocoa farmers due to their high tendency to cause yield  
473 reduction, their fast spreading nature in the field and high devastating effects in terms of pod  
474 destruction, depletion in quality nutrients of the bean, distortion of cocoa bean texture, colour  
475 and reduction of market values made it a major challenge for local cocoa growers within these  
476 terrain. A similar observation was also recorded by Flood co-workers [28].

### 477 **Black pod disease profile in the rural areas of Southwest, Nigeria**

478 Black pod disease was noticed early in “Owódé-Igàngán”, an area close to Ilèsà within  
479 Àtàkúnmòsà East of Osun State and “Iyánfowórogi” located in Ife South (both in Osun State) in  
480 the month of May, 2015; few months after the commencement of the rainy season. This was  
481 indeed a reaffirmation of the statement made by Adisa and Adeloye [25] that Osun State has  
482 been identified as a black pod disease prone region. Other research locations had no prevalence  
483 of the disease. This was partly due to the fact that the environment was not favourable enough at  
484 that point in time for the proliferation of black pod disease pathogen.

485 There was a change in the disease trend for the month of June 2015 as “Wáàsimi” (an area  
486 located in the heart of Ondo State) had the highest black pod disease occurrence, closely

487 followed by “Iyánfowórogì” in Ife South, “Òwenà (still in Ondo), and Adaàgbà (a village in  
488 close proximity with “Iyánfowórogì ” in Ife South of Osun State). Other locations like Ogun  
489 State and Oyo State were black pod disease free. The same pattern of disease trend was  
490 described by Opoku [3] in Ghana that the primary infections usually occur around June, but the  
491 peak of black pod disease invasion generally occurs between August and October.

492 A similar pattern of disease spread was also observed for the month of July but in this case  
493 “Òwenà and Wáàsìmi had massive black pod disease incidence. Iyánfowórogì and Adaàgbà too  
494 had substantial disease spread which was becoming a cause for worry to the local farmers.  
495 Dáagi-Lógbà in Qnà-Arà local Government of Oyo State surprisingly joined the group of black  
496 pod disease infected areas. This was still in concordance with previous findings [3, 7].

497 The pinnacle of infection was in August 2015 where the disease prevalence was at its peak,  
498 unfortunately the same trend of black pod disease spread persisted, Òwenà and Wáàsìmi (both  
499 leading cocoa growing communities not just in the Southwest but in Nigeria at large) were at the  
500 forefront of the disease predicament and as such the spotlight for research focus. Infected areas  
501 like these with massive input in commercial cocoa production are regarded by epidemiologists as  
502 the “area under disease curve” (AUDC). Farmlands in areas like Dáagi-Lógbà, Adaàgbà,  
503 Iyánfowórogì and Qbáfémi-Owódé also had their fair share of infection. A similar observation  
504 was also noted by Appiah [7] in the tropical regions of Ghana (where cocoa are widely  
505 cultivated) that the height of *P. megakarya* induced black pod disease infection generally occurs  
506 between August and October.

507 In September 2015, there was a change in disease preference with Adaàgbà taking the lead  
508 trailed by Qbáfémi-Owódé, Dáagi-Lógbà, Wáàsìmi, Òwenà, and Iyánfowórogì with the least

509 level of black pod disease prevalence. There was a massive decline in disease outbreak in some  
510 locations in the month of October like Dáagi-Lógbà, Wáàsimi and Òwenà, Iyánfowórogì and  
511 Adaàgbà etc. Interestingly, Qbáfémi-Owódé showed a progressive geometric increase in black  
512 pod diseases occurrence. The observations made from other locations (with the exception of  
513 Qbáfémi-Owódé) were in contrast with the assertions given by Opoku [29] who noted that the  
514 peak period for black pod disease invasion were between the months of August and October  
515 where there is sufficient amount of surface water in the surrounding environment and high  
516 pathological activities of the pathogen.

517 With the onset of the dry season, culminating in a drastic reduction in the top soil surface water,  
518 reduced amount of rainfall, high ambient temperature, increased hours of sunshine (high  
519 luminous potentials), decreased air saturation (low relative humidity) and due to the fact that  
520 most cocoa farmers have harvested their pods from the farm, black pod disease occurrence for  
521 the months of November and December 2015, likewise January, February, March, April and  
522 May 2016 was drastically reduced to non-significant levels, and as such the disease posed no  
523 threats to farmers during these period. This was in agreement with the reports given by Oluyole  
524 and Lawal [30] who reiterated that black pod disease is prevalent only during the wet season.

## 525 **Black pod disease profile in Ogun, Ondo, Osun and Oyo States**

526 The statutory investigation of the average monthly black pod disease prevalence for Ondo, Ogun,  
527 Osun and Oyo States was such that Osun State had a significant level of occurrence for the  
528 month of May 2015 compared to other States with no recorded history or field reports for black  
529 pod disease prevalence in May. Ondo and Osun States had a seemingly similar level of disease  
530 prevalence, co-occupying the top position for black pod disease spread during the month of June



531 2015, whereas there was no report of the disease in Ogun and Oyo States. This can be partly  
532 explained by the similarity in weather pattern based on proximity in distance and agro-ecological  
533 zoning of these States, a theme well described by Ziervogel [31] who stated that climate change  
534 has wide-ranging effects on the environment including water resources, agriculture, food  
535 security, human health, terrestrial ecosystems, biodiversity and coastal zones.

536 In July 2015, Ondo State had the highest level of black pod disease occurrence, seconded by  
537 Osun State. Other States had little, insignificant or no disease prevalence at the point of  
538 investigation. The preference for disease spread was uttered in the month of August 2015 with  
539 Ondo State maintaining top position, subsequently followed by Oyo State. Osun State and Ogun  
540 State just had minimal levels of black pod disease prevalence. Surprisingly, Ogun State had the  
541 highest values for disease prevalence for the months of September and October 2015 during the  
542 statutory disease assessment routine, followed by Oyo State, Osun State and lastly, Ondo State.  
543 There was no occurrence of black pod disease in the dry season for all the cocoa farms  
544 investigated in the course of this research. This was totally due to the fact that there was no  
545 surface water to facilitate the proliferation and spread of the pathogen and most cocoa farmers  
546 had harvested all their cocoa pods from the field. This was in agreement with the reports given  
547 by Oluyole and Lawal [30] who reiterated that black pod disease is prevalent only during the  
548 rainy season and that moisture is a pertinent factor for the development and spread of the disease.

## 549 **Topography of cocoa farmland and its influence on black pod** 550 **disease development**

551 It was learned in connection with this research that the establishment, spread and prevalence of  
552 black pod disease on farmlands located in areas of high altitude (>200m) had geometric increase  
553 from the months of May through August 2015, followed by a rapid decline in the month of

554 September and October. The aim of this assessment was to further determine the significance of  
555 altitude in black pod disease development. Farmlands located in regions with lesser altitude  
556 (<200m) had a slow start to black pod disease development with the pinnacle of black pod  
557 disease spread in September 2015 and an abrupt decline in October 2015 through May 2016. A  
558 cross comparison between the two height levels showed that the activities of the pathogen was  
559 closely affected by the height above sea level of the environment and the rate of spread of the  
560 disease was largely influenced to a great extent by the topography of the farmland.

### 561 **The intensity of black pod disease in Southwest Nigeria**

562 It was observed that the trend of black pod disease development and spread in Southwest,  
563 Nigeria was logarithmical with a very slow start in the month of May 2015 and a gradual  
564 increase through the months of June 2015, through July 2015 and August 2015 were the peak of  
565 disease occurrence within the earmarked research locations were observed. A decline in black  
566 pod disease value was observed in the month of September 2015, and further decline in disease  
567 value occurred in October 2015 prior to harvesting of cocoa pods by farmers. The months of  
568 November, December 2015, January, February, March, April and May 2016 had unsubstantial  
569 amount of black disease severity.

570 The same trend of disease history was observed within this zone for the disease severity. The  
571 zenith of disease intensity was in September 2015 and the least recorded degrees of black pod  
572 disease intensity were for the months of November, December 2015, January, February, March,  
573 April and May 2016 with insignificant disease intensity, which was largely due to the fact that  
574 most farmers have harvested their cocoa pods and the Cherelles (young pods) which are still in  
575 the juvenile stage were not the preferential target of *Phytophthora megakarya*. During these

576 periods the farm environment was devoid of water which is a pertinent factor for the  
577 proliferation of the organism (*Phytophthoramegakarya*) that caused black pod disease.

## 578 **The role of seasonal variation in black pod disease expression in** 579 **Southwest, Nigeria**

580 It was reported that Ondo State had the highest level of black pod disease prevalence (Incidence)  
581 during the close of the year 2015 and Osun State had the highest level of disease Intensity  
582 (Severity). These values were recorded during the rainy season. This was in agreement with the  
583 research work of Akrofi [24] who reiterated that the survival and proliferation of *Phytophthora*  
584 *megakarya* depends majorly on the availability of water most especially during the rainy season  
585 where water is present in abundance in most cocoa farmlands around the African continent.

## 586 **A general assessment of the development and severity of black pod** 587 **disease in Southwest, Nigeria**

588 The overall annual disease occurrence observed within Southwest, Nigeria for the cocoa  
589 production season ending 2016 were mildly severe while the levels of disease intensity on the  
590 affected cocoa pods were moderately and extremely severe in some cases. The irregular black  
591 pod disease management rate achieved around the investigated region was due to the fact that the  
592 level of preparedness of the farmers within the affected region in terms of fungicide application  
593 and good cultural practices to wade of potential agents of propagation and spread of the disease  
594 differs greatly, partly due to ignorance and the level of information on the control of the disease  
595 available to the local cocoa farmers and majorly due to financial constraints. This was in line  
596 with the findings of the Cocoa Research Institute of Nigeria (2003).

## 597 **Level of destruction of black pod disease in rural and sub-urban** 598 **community of Southwest, Nigeria**

599 The routine disease assessment conducted within twelve (12) selected rural and sub-urban  
600 settlements in Nigeria reputed for cocoa farming in the Southwest showed that the level of black  
601 pod disease intensity during the month of May 2015 was relatively high for “Owódé -Igàngán”  
602 and “Iyánfowórogi” which were regarded as key cocoa production areas in Osun State. Other  
603 locations across the Southwest of Nigeria had insignificant levels of black pod disease severity.  
604 For the month of June 2015, “Wáàsimi”, “Iyánfowórogi”, “Òwenà etc. all had significant levels  
605 of black pod disease severity, fascinatingly, Adaàgbà had the highest record of disease intensity  
606 during this period. Other locations showed no signs of black pod disease severity.

607 The same pattern of disease severity was also observed for the month of July but in this case  
608 Òwenà had the highest black pod disease incidence, with other sampled points like Wáàsimi,  
609 Iyánfowórogi, Adaàgbà and Dáagi-Lógbà trailing closely behind. The pinnacle of black pod  
610 disease severity was in September and not in August 2015 as conveyed in the earlier report of its  
611 spread and prevalence. It was observed that a similar trend of disease severity occurred in August  
612 within this zone, with Òwenà having a massive black pod disease infestation, Wáàsimi, Dáagi-  
613 Lógbà, Adaàgbà, Iyánfowórogi and Qbáfémi-Owódé too had their fair share of black pod disease  
614 infestation. This was described in previous reports [3,7].

615 In September 2015, there was a change in disease preference with Òwenà having the highest  
616 mean recorded value for disease severity, Adaàgbà and other regions were reported to have  
617 severe black pod disease intensity (Qbáfémi-Owódé, Dáagi-Lógbà, Wáàsimi, and Iyánfowórogi).  
618 There was a massive decline in disease severity in some locations in the month of October like  
619 Dáagi-Lógbà, Wáàsimi, Òwenà, Iyánfowórogi and Adaàgbà, but surprisingly, Qbáfémi-Owódé

620 showed a progressive geometric increase in black pod diseases intensity. The basic rationale  
621 behind the heavy infestation by black pod disease was in the lack of disease management  
622 strategy employed by the farmer. This confirms the assertion stated by Berry and Cilas [32] that  
623 losses can reach up to 100% of the cocoa production in smallholders' plantations when no  
624 control measures are taken.

625 With the onset of the dry season, culminating in a drastic reduction in the top soil surface water,  
626 reduced amount of rainfall, high ambient temperature, increased hours of sunshine (high  
627 luminous potentials), decreased air saturation (low relative humidity) and due to the fact that  
628 most cocoa farmers have harvested their pods from the farm, black pod disease severity for the  
629 months of November and December 2015, likewise January, February, March, April and May  
630 2016 was drastically reduced to non-significant levels, and as such the disease posed no threats  
631 to farmers during these periods. This was in line with the assertion made by Ziervogel *et al.* [31].

### 632 **Black pod disease intensity in Ogun, Ondo, Osun and Oyo States**

633 It was observed that black pod disease started very early in cocoa farmlands located in Osun state  
634 in the month of May 2015 during the rainy season. Osun State still led the chart for high ranking  
635 black pod disease severity in the southwest for the month of June 2015, followed by Ondo State.  
636 Other States had insignificant disease history for the month of June 2015. There was rapid  
637 geometric increase in black pod disease expression and intensity within the months of July and  
638 August with a climax in September 2015 for Ondo State, Osun State, Oyo State and Ogun State.  
639 The same sequence for disease prevalence was earlier given by Appiah [7]. Other preceding  
640 months had insignificant disease intensity status.

## 641 **Landscape and black pod disease expression on cocoa pods in** 642 **Nigeria**

643 There was disease infestation recorded for cocoa farmlands located within areas situated in  
644 altitude higher than 200m above sea level (201m-300m) and none for areas located below 200m  
645 above sea level in the month of May 2015. The same trend was observed in June 2015. The  
646 disease intensity trend was progressive through the months of July 2015 and August, with its  
647 peak value in September 2015 for cocoa farmlands located in areas situated below 200m height  
648 above sea level, follow by retrogression in disease intensity value in October 2015, through the  
649 dry season. This was as suggested by Appiah [7].

## 650 **Supporting information**

### 651 **S1 Appendix: Details of study sites**

652 **S1 Fig: A semi-biased mode of disease sampling within an earmarked cocoa field (T - Cocoa**  
653 **tree)**

## 654 **Conclusion**

655 It was established by the research conducted that black pod disease was and still is a major threat  
656 to cocoa farmers in Southwest, Nigeria. Farmers within the rural communities are indeed tired of  
657 the huge loss incurred from the spread of the disease due to the recurrent and devastating effects  
658 of the disease, cocoa farming is fast becoming a myth in this region. Unless concerted efforts  
659 towards black pod disease management is put in place, cocoa farming will go into extinction in  
660 Nigeria.

661

## 662 **References**

- 663 1. FAOSTAT; 2018 [cited 2018 Nov 12]. Database available from:  
664 <http://www.fao.org/faostat/en/#data/RFN>
- 665 2. Evans, H. C. 2007. Cacao diseases - The trilogy revisited. *J. Phytopathol.* 2007;97:1640-  
666 43.
- 667 3. Opoku IY, Appiah AA, Akrofi AY, Owusu GK. *Phytophthora megakarya*: a potential  
668 threat to the cocoa industry in Ghana. *Ghana J Agric Sci.* 2000;33(2):237-48.
- 669 4. Thorold CA. Diseases of cocoa. Clarendon Press.; 1975.
- 670 5. Dakwa JT. A serious outbreak of black pod disease in a marginal area of Ghana.  
671 InProceedings of the 10th international cocoa research conference 1987 May 17 (pp. 447-  
672 451).
- 673 6. Ali SS, Amoako-Attah I, Bailey RA, Strem MD, Schmidt M, Akrofi AY et al. PCR-based  
674 identification of cacao black pod causal agents and identification of biological factors  
675 possibly contributing to *Phytophthora megakarya's* field dominance in West Africa. *Plant*  
676 *Pathol.* 2016 Sep;65(7):1095-108.
- 677 7. Appiah AA, Opoku IY, Akrofi AY. Natural occurrence and distribution of stem cankers  
678 caused by *Phytophthora megakarya* and *Phytophthora palmivora* on cocoa. *Eur J Plant*  
679 *Pathol.* 2004 Dec 1;110(10):983-90.
- 680 8. Tucker CM. Taxonomy of the genus *Phytophthora* de Bary. *Research Bulletin of the*  
681 *University of Missouri Agricultural Experiment Station* 1931;53:208.
- 682 9. Chee KH. Hosts of *Phytophthora palmivora*. *Rev Appl Mycol.* 1969;48,337-44.
- 683 10. Chee KH. Variability of *Phytophthora* species from *Hevea brasiliensis*. *Trans Brit Mycol*  
684 *Soc.* 1969;52:425-36.

- 685 11. Sreenivasan TN. A new *Phytophthora*. Annual Report, Cacao Research Unit, St.  
686 Augustine, Trinidad, 1975.20pg.
- 687 12. Kaosiri T. Morphological, taxonomical and cytological studies of *Phytophthora*  
688 *palmivora*. PhD dissertation, University of California, Riverside 1978. 148pg
- 689 13. Brasier CM, Griffin MJ. Taxonomy of 'Phytophthora palmivora' on cocoa. Trans Brit  
690 Mycol Soc. 1979;72(1):111-43.
- 691 14. Kellam MJ, Zentmyer GA. Isolation of *Phytophthora citrophthora* from cacao in Brazil,  
692 Phytopathol. 1981;71:230.
- 693 15. Liyanage NIS, Wheeler BEJ. *Phytophthora katsurae* from cocoa. J Plant Pathol 1989;38:  
694 627-29.
- 695 16. Aragaki M, Uchida JY. Morphological distinctions between *Phytophthora capsici* and *P.*  
696 *tropicalis* sp. *Mycologia* 2001;93:137-45
- 697 17. Bowers JH, Bailey BA, Hebbar PK, Sanogo S, Lumsden R.D. The impact of plant  
698 diseases on world chocolate production. *Plant Health Proramme* 2001;3(1):13-16
- 699 18. Erwin DC, Ribeiro OK. *Phytophthora Diseases Worldwide*. Am Phytopathol Soc.  
700 1996;4(2):8-12
- 701 19. Chakraborty S, Tiedemann AV, Teng PS. Climate Change: Potential impact on plant  
702 diseases. Elsevier J Env Poll. 2000;108: 317-26
- 703 20. Zentmyer GA. Taxonomic relationships and distribution of species of *Phytophthora*  
704 causing black pod of cocoa. Proceedings of the Tenth International Cocoa Research  
705 Conference, Santo Domingo, Dominican Republic, 17-23 May 1987. London, UK:  
706 Cocoa Producers' Alliance, 391-395.
- 707 21. Agbeniyi SO, Adedeji AR. Current Status of Blackpod Epidemics in Nigeria.  
708 InProceedings of 14th International Cocoa Research Conference 2003 (pp. 1377-1380).



- 709 22. Luo W. *Spatial/temporal modelling of crop disease data using high-dimensional*  
710 *regression* (Doctoral dissertation, University of Leeds (Department of Statistics)).
- 711 23. Lawal JO, Emaku LA. Evaluation of the effect of climatic changes on Cocoa production  
712 in Nigeria: Cocoa Research Institute of Nigeria (crin) as a case study. In *African Crop*  
713 *Science Conference Proceedings 2007* (Vol. 8, pp. 423-426).
- 714 24. Akrofi AY. *Phytophthora megakarya: A review on its status as a pathogen on cacao in*  
715 *West Africa*. *Afr Crop Sci J*. 2015;23(1):67-87.
- 716 25. Adisa BO, Adeloye KA. Analysis of farmer field school as an extension approach to  
717 cocoa production in Osun State, Nigeria. *World J Agric Sci* 2012;8(4):421-8.
- 718 26. Adeniyi OR, Ogunsola GO. Cocoa production and related social-economic and climate  
719 factors: A case study of Ayedire local government area of Osun State, Nigeria. *Agric Sci*.  
720 2014;2(4):1-3.
- 721 27. Anim-Kwapong GJ, Frimpong EB. Vulnerability of agriculture to climate change-impact  
722 of climate change on cocoa production. Accra, Ghana. 2005.
- 723 28. Flood J, Murphy R. Cocoa futures: A source book of some important issues facing the  
724 cocoa industry. Federación de Cafetaleros de Colombia, Chinchiná (Colombia) CABI,  
725 Londres (RU) Department of Agriculture, Washington, DC (EUA); 2004.
- 726 29. Opoku IY, Assuah MK, Aneani F. Management of black pod disease of cocoa with  
727 reduced number of fungicide application and crop sanitation. *Afr J Agric Res*. 2007 Nov  
728 30;2(11):601-4.
- 729 30. Oluyole KA, Lawal JO. Determinants of the occurrence of black pod disease of cocoa in  
730 Edo State, Nigeria: A multivariate probit analysis approach. *J. Innov Dev Strat*.  
731 2008;2(2):1-4.

- 732 31. Ziervogel G, Nyong A, Osman B, Conde C, Cortés S, Downing T. Climate variability  
733 and change: Implications for household food security. Assessment of Impacts and  
734 Adaptations to Climate Change (AIACC): Washington, DC, USA. 2006 Jan.
- 735 32. Berry D, Cilas C. Genetic study of the behaviour to black pod disease of cocoa  
736 (*Theobroma cacao* L.) obtained by diallel crossings. *Agronomie*. 1994;14(9):599-609.
- 737

# Location of Cocoa Farms Assessed In Southwest, Nigeria

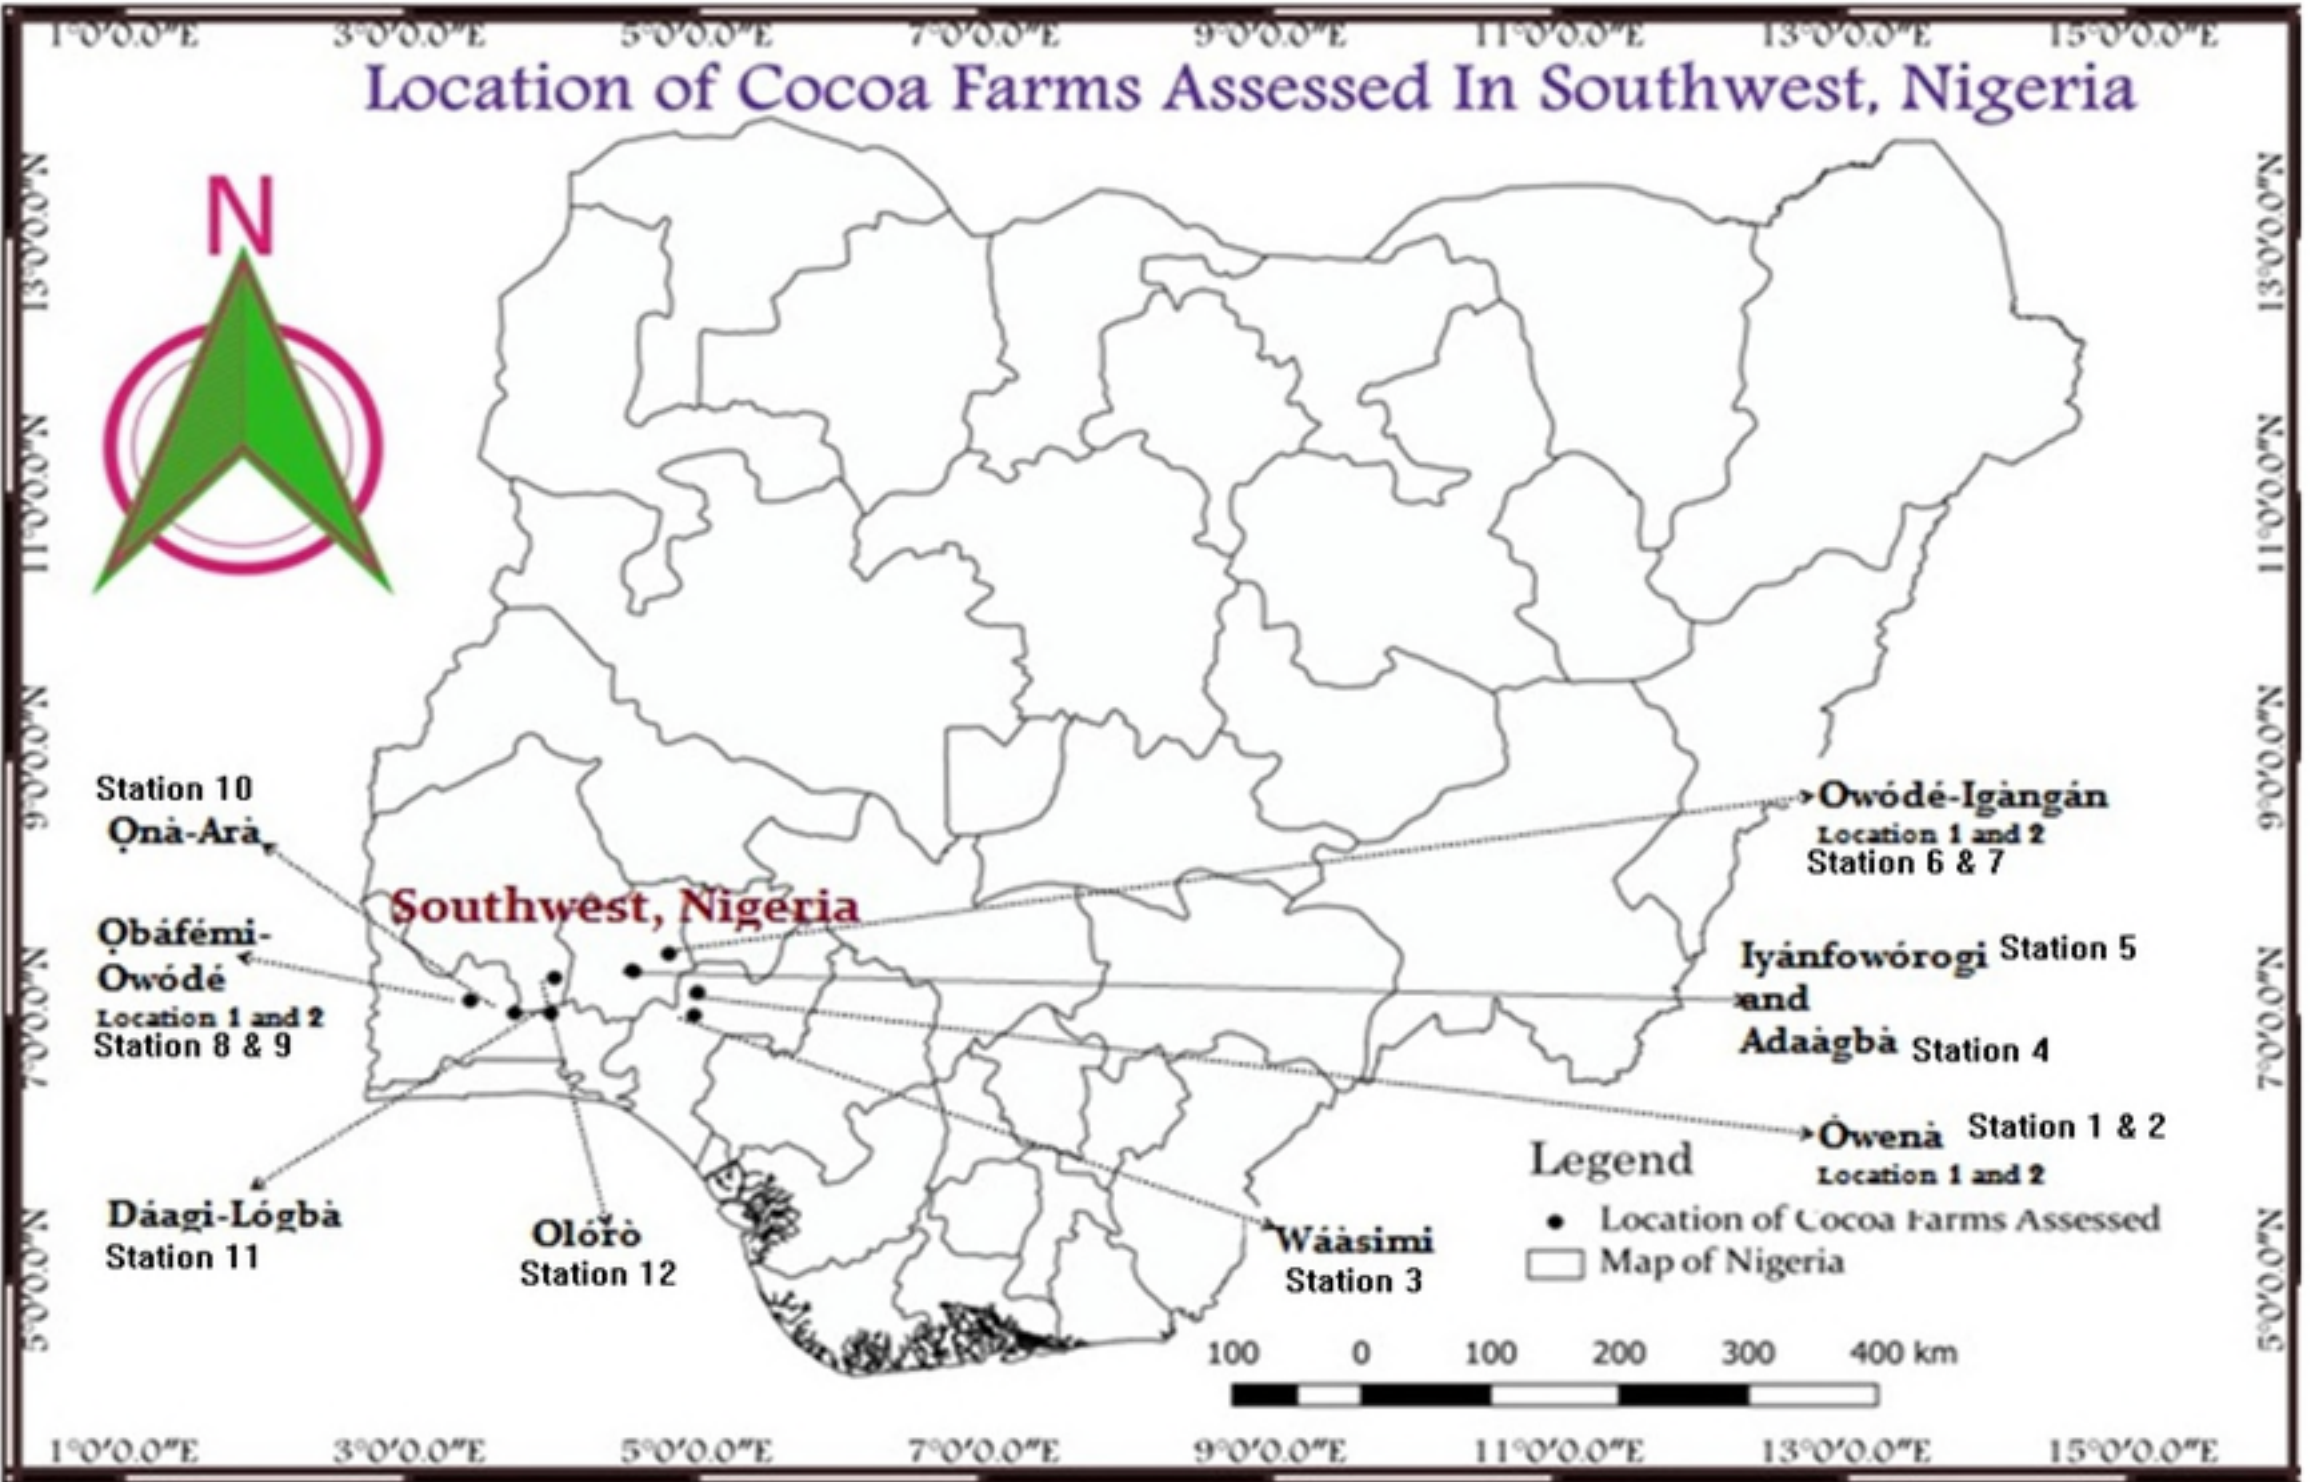

Fig 1

# Black Pod Disease Occurrence in Southwest, Nigeria

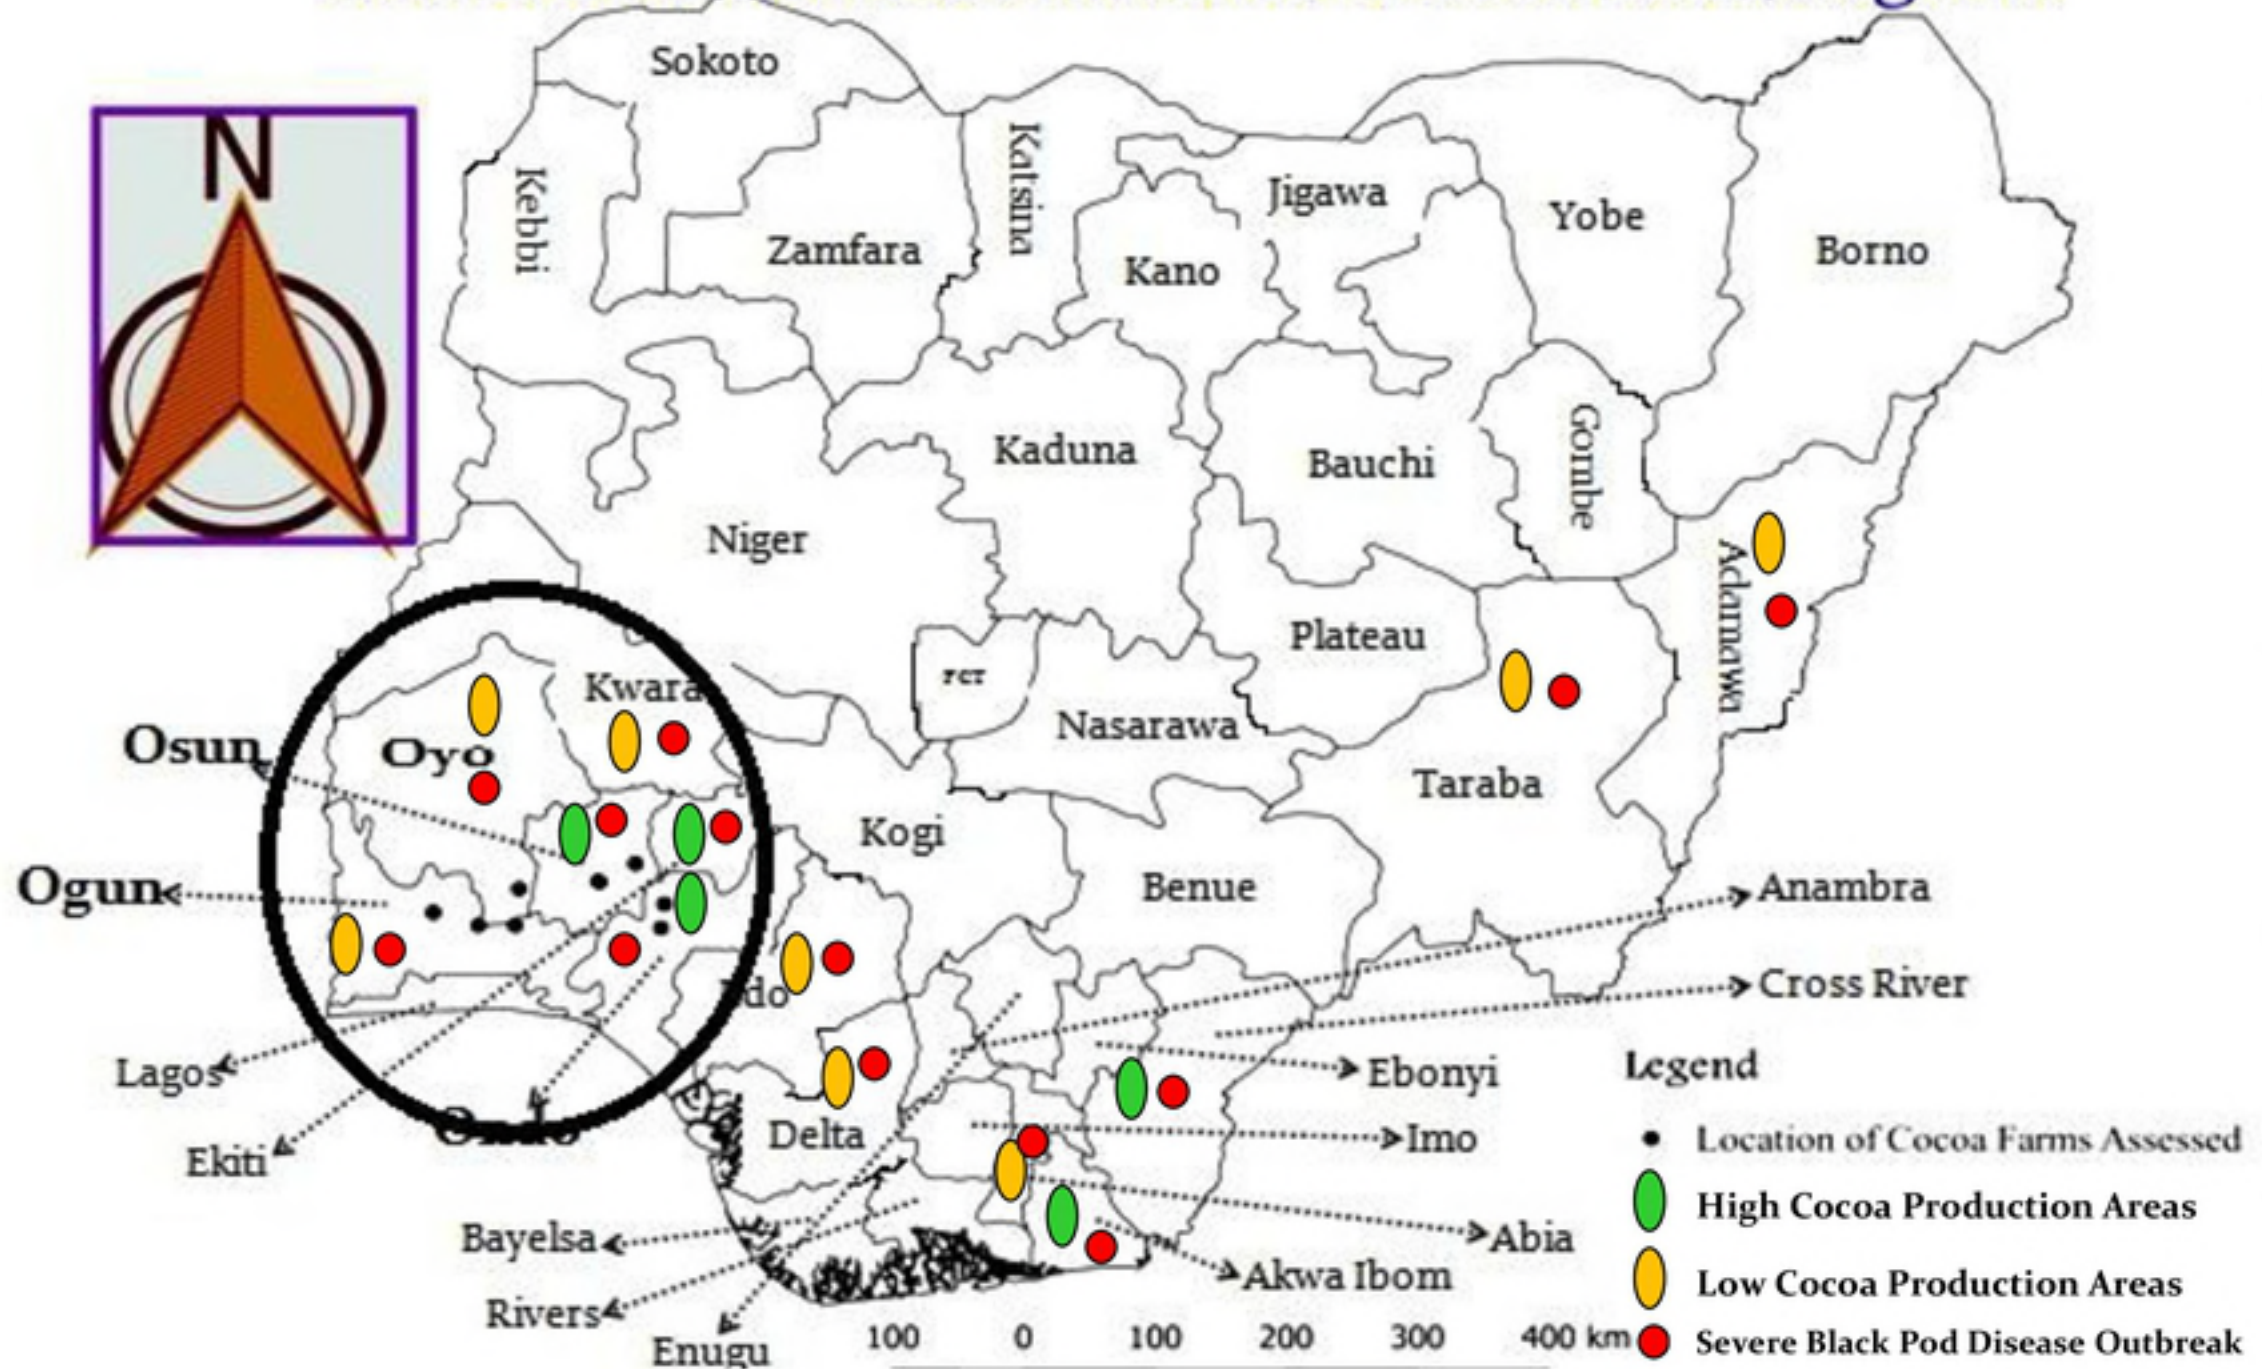

Fig 2

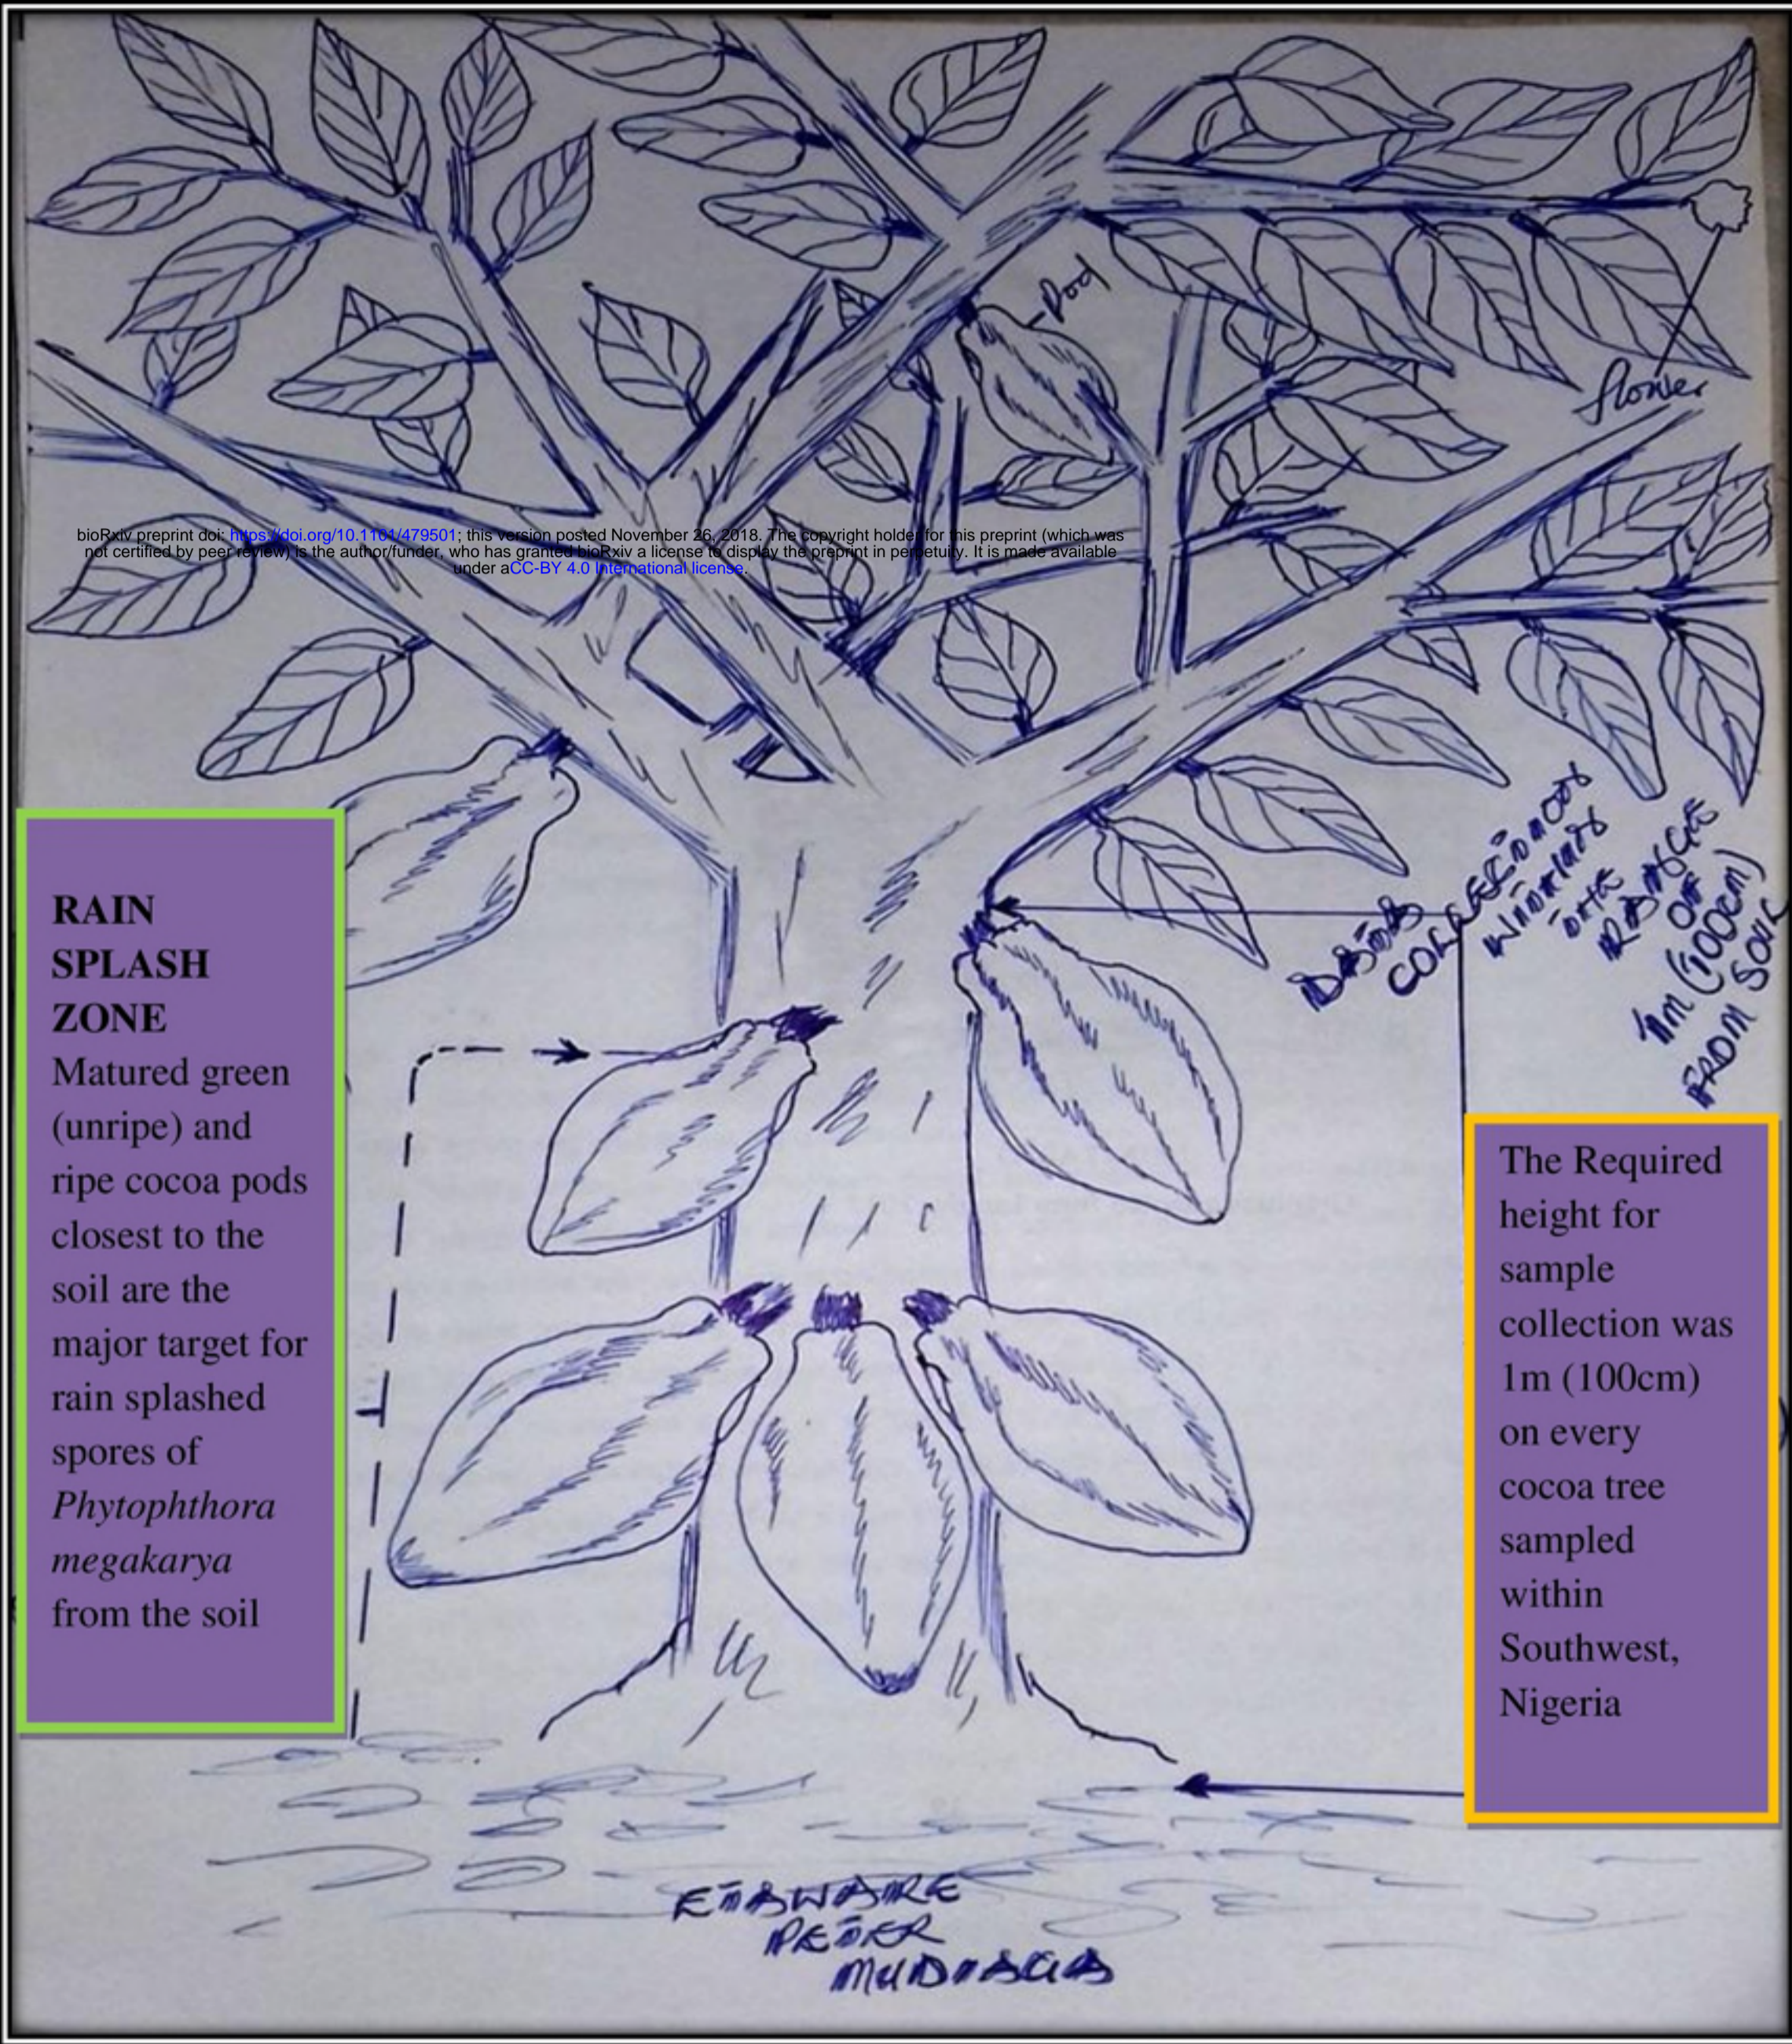

Fig 3

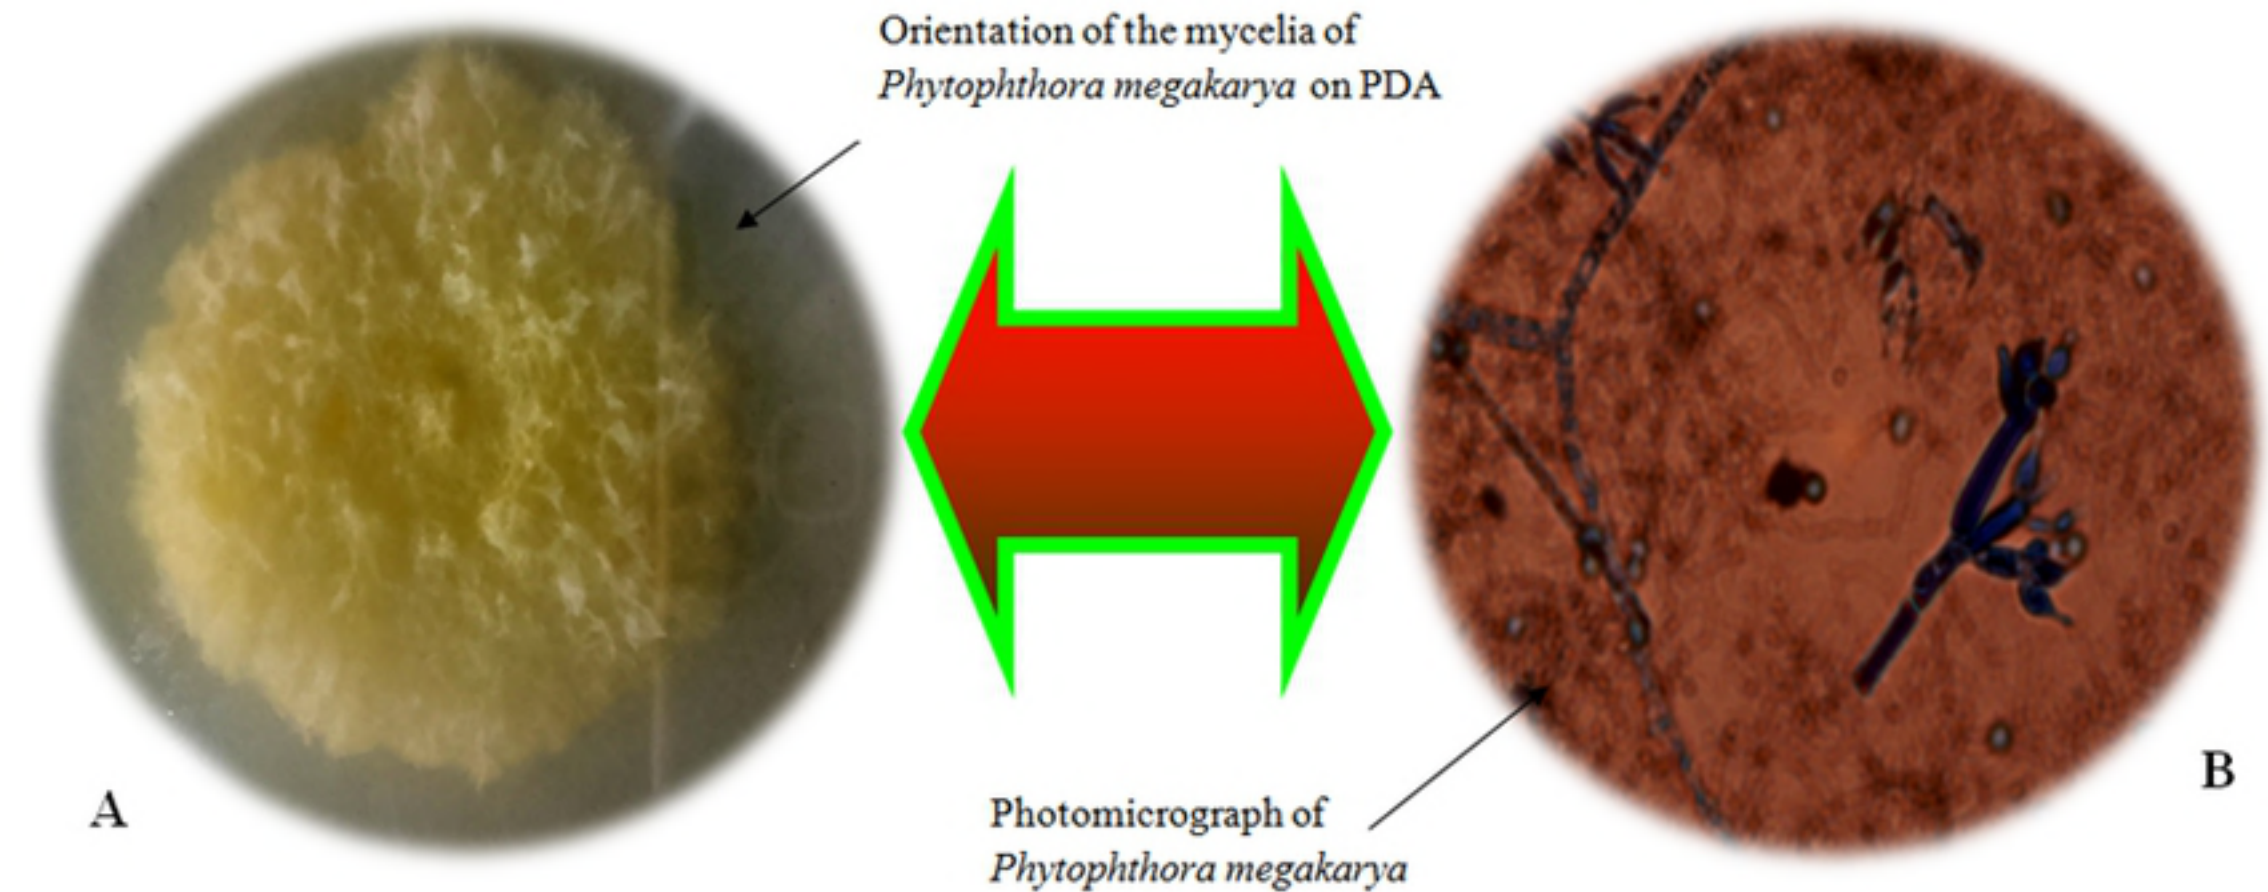

Fig 4

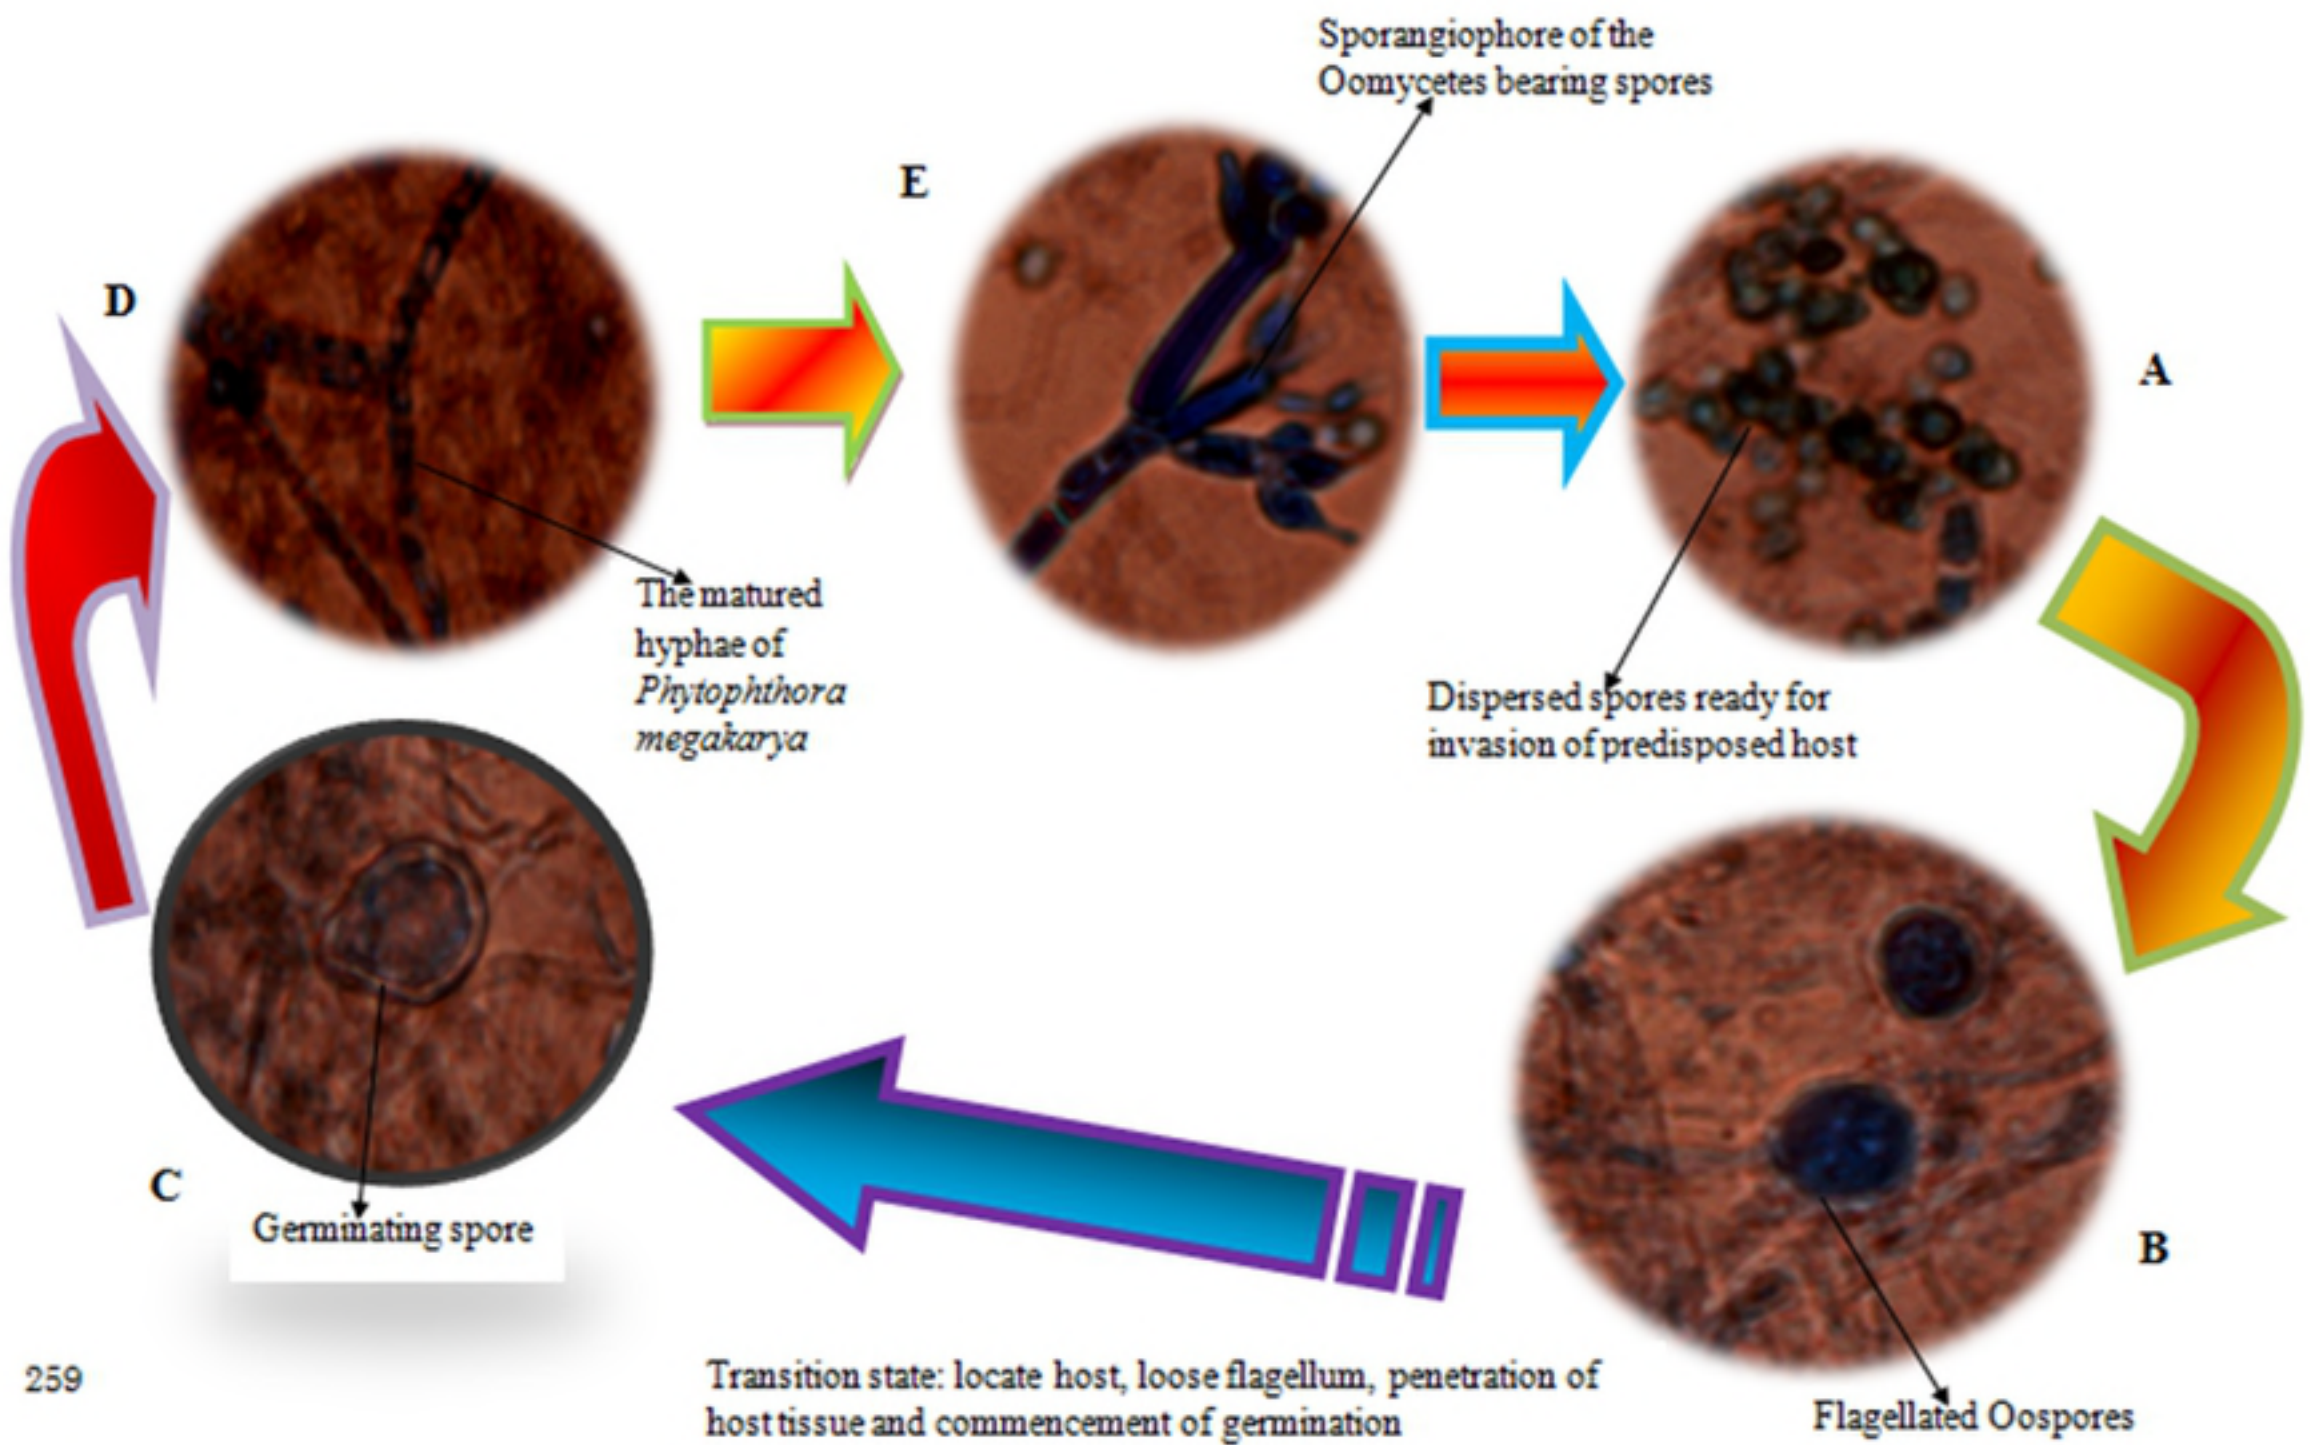

Fig 5

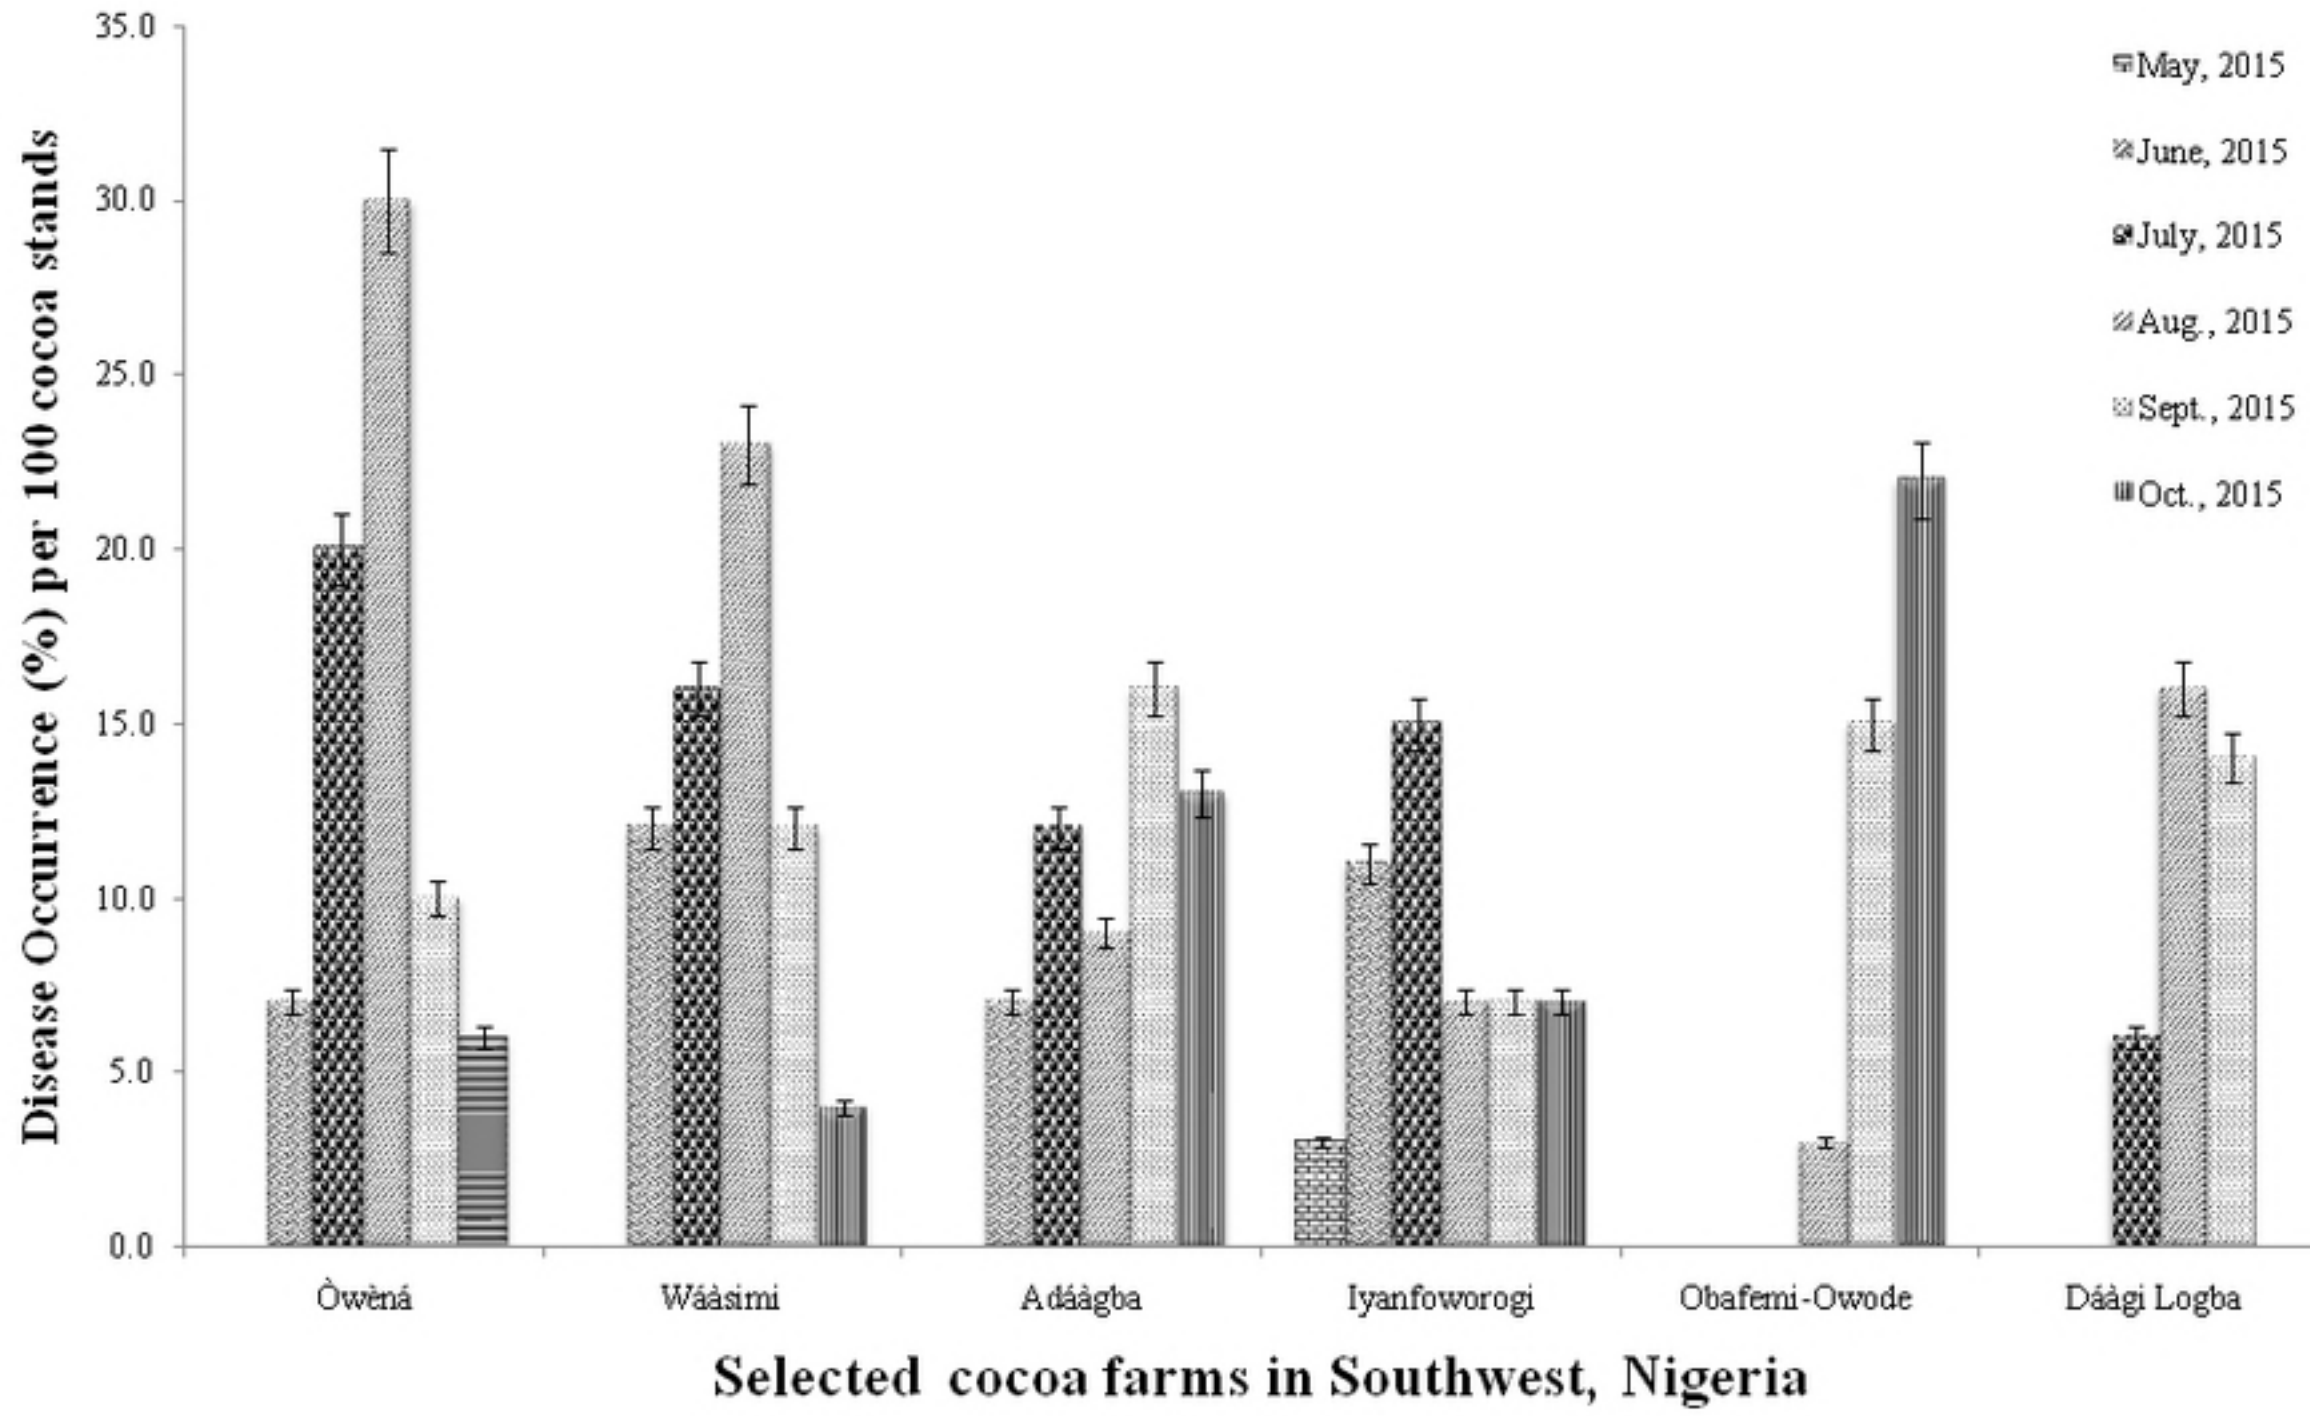

Fig 6
